1 Distinctive tasks of different cyanobacteria and associated bacteria in carbon as well as  
2 nitrogen fixation and cycling in a late stage Baltic Sea bloom

3

4

5 Falk Eigemann<sup>1\*</sup>, Angela Vogts<sup>1</sup>, Maren Voss<sup>1</sup>, Luca Zoccarato<sup>2</sup>, Heide Schulz-Vogt<sup>1</sup>

6 <sup>1</sup> Leibniz Institute for Baltic Sea Research Warnemünde, Department of Biological

7 Oceanography, 18119 Rostock, Germany

8 <sup>2</sup> Leibniz-Institute for Freshwater Ecology and Inland Fisheries, Department of Stratified

9 Lakes, Alte Fischerhütte 2, OT Neuglobsow, 16775 Stechlin, Germany

10

11 \*falkeigemann@gmail.com, phone: 0049-381-51973462, fax: 0049-381-5197-211

12

13

14 Short title: Distinctive tasks in cyanobacterial blooms

15

16

17

18

19

20

21

## 22 Abstract

23 Cyanobacteria and associated heterotrophic bacteria hold key roles in carbon as well as  
24 nitrogen fixation and cycling in the Baltic Sea due to massive cyanobacterial blooms each  
25 summer. The species specific activities of different cyanobacterial species as well as the N-  
26 and C-exchange of associated heterotrophic bacteria in these processes, however, are widely  
27 unknown. Within one time series experiment we tested the cycling in a natural, late stage  
28 cyanobacterial bloom by adding  $^{13}\text{C}$  bi-carbonate and  $^{15}\text{N}_2$ , and performed sampling after 10  
29 min, 30 min, 1 h, 6 h and 24 h in order to determine the fixing species as well as the fate of  
30 the fixed carbon and nitrogen in the associations. Uptake of  $^{15}\text{N}$  and  $^{13}\text{C}$  isotopes by the most  
31 abundant cyanobacterial species as well as the most abundant associated heterotrophic  
32 bacterial groups was then analysed with a NanoSIMS. Overall, the filamentous, heterocystous  
33 species *Dolichospermum* sp., *Nodularia* sp., and *Aphanizomenon* sp. revealed no or erratic  
34 uptake of carbon and nitrogen, indicating mostly inactive cells. In contrary, non-heterocystous  
35 *Pseudanabaena* sp. dominated the nitrogen and carbon fixation, with uptake rates up to  $1.49 \pm$   
36  $0.47 \text{ nmol N h}^{-1} \text{ l}^{-1}$  and  $2.55 \pm 0.91 \text{ nmol C h}^{-1} \text{ l}^{-1}$ . Associated heterotrophic bacteria dominated  
37 the subsequent nitrogen cycling with uptake rates up to  $1.2 \pm 1.93 \text{ fmol N h}^{-1} \text{ cell}^{-1}$ , but were  
38 also indicative for fixation of di-nitrogen.

39

## 40 1. Introduction

41 Cyanobacterial mass occurrences are a worldwide phenomenon in limnic, brackish and  
42 marine systems. In the Baltic Sea, such blooms occur regularly during summer [1], and due to  
43 their high biomasses they significantly add to eutrophication [2,3]. The onset of blooms is  
44 promoted by rising water temperatures and low N:P ratios after N-depletion due to the  
45 capability of atmospheric nitrogen fixation by several cyanobacterial species [1,3,4]. Total  
46 cyanobacterial nitrogen fixation in the Baltic Sea was estimated with  $370 \text{ kt yr}^{-1}$  [2], and may

47 contribute up to 55% of total nitrogen input [5,6]. Furthermore, filamentous cyanobacteria  
48 may contribute for 44% of the community primary production [7]. The major part of nitrogen  
49 and carbon fixation is performed in the early summer, followed by a peak in biomass, and  
50 ultimately the decay of the bloom in which predominantly recycling processes occur [6,8].

51 Cyanobacteria as well as eukaryotic phytoplankton live in close associations with  
52 heterotrophic bacteria, and interactions between them may range from symbiosis to  
53 competition [9,10]. These interactions strongly influence carbon and nutrient cycling and  
54 therewith the stability of aquatic food webs [11, 12]. In phytoplankton blooms, heterotrophic  
55 bacteria may provide macronutrients via recycling (or fixation) but may be also competitors  
56 for inorganic nutrients [11]. Especially at the late stages of cyanobacterial blooms, the  
57 associated heterotrophic bacteria may be responsible for a significant share of elemental  
58 cycling and fluxes, i.e. for the input of nutrients and organic matter in the ecosystem due to  
59 remineralization. Studies on the role of associated bacteria at these late cyanobacterial bloom  
60 stages, however, are lacking.

61 The predominant cyanobacterial genera in Baltic Sea blooms are *Aphanizomenon*, *Nodularia*,  
62 *Dolichospermum*, *Pseudanabaena* and *Synechococcus*, whereby the dominant groups and  
63 species may differ between years and stage of the bloom [12]. The first three mentioned  
64 genera are filamentous and heterocystous, and may form dense surface scums [1]. Baltic Sea  
65 *Synechococcus* sp. and *Pseudanabaena* sp. are supposed to be not capable of nitrogen fixation  
66 and hence depend on dissolved nitrogen sources [13,14], even though nitrogenase genes occur  
67 in *Pseudanabaena* [14,15]. Thus, *Aphanizomenon*, *Nodularia*, and *Dolichospermum* are  
68 thought to dominate the biological nitrogen input into the Baltic Sea [14]. Recently, however,  
69 heterotrophic bacteria were shown to be capable of nitrogen fixation at depth in the central  
70 Baltic Sea [16] and may even be the principle N<sub>2</sub> fixing organism in a Baltic Sea estuarine  
71 [17]. However, studies that examined carbon and nitrogen fixation in cyanobacterial blooms  
72 and associated heterotrophic bacteria mostly focussed on single cyanobacterial species [7,18],

73 or neglected associated bacteria as well as the fate of the fixed carbon and nitrogen in the  
74 associations [14]. In the present study, we incubated a natural late stage Baltic Sea  
75 cyanobacterial bloom with  $^{13}\text{C}$  bi-carbonate and  $^{15}\text{N}_2$ , and followed the uptake over time by  
76 means of NanoSIMS technique. Therewith, we aimed at unravel the specific contribution of  
77 different cyanobacterial species and associated heterotrophic bacteria in carbon and nitrogen  
78 fixation as well as the fate of the fixed carbon and nitrogen in the associations.

79

## 80 2. Material and Methods

### 81 2.1. Incubation experiments:

82 A natural cyanobacterial bloom was sampled at station TransA ( $58^{\circ}43.8'\text{N}$ ,  $18^{\circ}01.9'\text{E}$ , Fig. 1)  
83 on 13.08.2015. Bloom samples were further concentrated by means of a light trap to remove  
84 positive phototactic zooplankton until a cyanobacterial chl. a concentration of  $9\ \mu\text{g l}^{-1}$  was  
85 reached (measured with a PHYTO-PAM, Heinz Walz GmbH). At Askö laboratory (ca. 1 h  
86 transfer), five 176 mL opaque Nalgene bottles were filled with the concentrated bloom till  
87 overflowing and sealed with septum caps enabling addition and retrieval of liquids with  
88 syringes.

89 Figure 1: True color satellite image of a cyanobacterial bloom in the Baltic Sea on August 13,  
90 2015 derived from MODIS/Terra (NASA/GSFC, Rapid Response). The arrow in the zoom  
91 image on the right side points towards the sampling station TransA.

92 For  $^{15}\text{N}$  addition, 1 mL of the sample was removed and subsequently 1 mL 99% pure  $^{15}\text{N}_2$  gas  
93 injected with a syringe, resulting in 31.68 atom %  $^{15}\text{N}$ . For amending  $^{13}\text{C}$ , 5 ml sample were  
94 removed with a syringe and subsequently 5 ml F/2 medium [52] without nitrogen source,  
95 adjusted to 8 PSU and spiked with 0.4 g  $\text{NaH}^{13}\text{CO}_3$  added (final concentration 108.36 atom %  
96  $^{13}\text{C}$ ). Incubation times were 10 min, 30 min, 1 h, 6 h and 24 h. Bottles were incubated in an

97 incubation chamber at  $16.5 \pm 0.5$  °C at approximately  $60 \mu\text{mol photons s}^{-1} \text{m}^{-2}$  (delivered from  
98 ROHS 36W 840 light bulbs), resembling the natural conditions of sampling under constant  
99 light (Supplemental 1).

100

## 101 2.2. Sampling

102 Each sample was fixed with formaldehyde (2% final concentration) for 3 h in the dark at  
103 room temperature, and filtered gently onto  $3 \mu\text{m}$  pore width polycarbonate filters for later  
104 inspection with CARD-FISH and NanoSIMS. Before start of the incubation, 80 mL of the  
105 stock sample were filtered onto  $3 \mu\text{m}$  pore width polycarbonate filter for DNA extraction of  
106 the associated bacterial fraction. For phytoplankton counting, a 100 mL subsample was fixed  
107 with an acidic Lugol solution [19] and counted according to the Utermöhl technique. To  
108 determine biomass percentages, the carbon content ( $\mu\text{g l}^{-1}$ ) of each species was calculated  
109 using the official PEG Biovolume Report 2016 (International Council for the Exploration of  
110 the Sea) for phytoplankton species and the carbon content per counting unit for the respective  
111 size class.

112

## 113 2.3. DNA extraction

114 DNA was extracted as described in [20] with modifications. Briefly, the filters were cut into  
115 pieces and mixed with sterilized zirconium beads, 500  $\mu\text{l}$  of phenol/chloroform mix, and 500  
116  $\mu\text{l}$  of SLS extraction buffer. After centrifugation of the mixture, the supernatant was  
117 transferred to another tube and the process was repeated. DNA was precipitated overnight at  
118  $-20^\circ\text{C}$ . The pellet was washed with ethanol, dried, and resolved in autoclaved DEPC-treated  
119 water.

120

## 121 2.4. PCR and sequencing

122 For PCRs, 10 ng of DNA was added to autoclaved DEPC-treated water, 10× PCR buffer,  
123 BSA, MgCl<sub>2</sub>, dNTPs, forward and reverse primers, and native Taq polymerase. Bacterial  
124 DNA was amplified using the primers 341f and 805r [21], under the following conditions: 30  
125 cycles of denaturation for 40 s at 95°C, 40 s of annealing at 53°C, and 1 min of elongation at  
126 72°C. PCR products were cleaned with the Nucleospin kit following the manufacturer's  
127 instructions and shipped to LGC Genomics GmbH (Berlin). Illumina MiSeq V3 sequencing  
128 with 300 bp paired-end reads was performed using the 16S primers 341F and 785R. The  
129 forward and reverse reads were deposited at the European Nucleotide Archive under the  
130 accession number PRJEB23316 (sample B15\_3). Taxonomic identification of the associated  
131 bacterial community, was performed as described in [22] with the NGS analysis pipeline of  
132 the SILVA rRNA gene database project (SILVAngs 1.3).

133

## 134 2.5. CARD-FISH analyses

135 The Illumina runs mostly yielded Alphaproteobacteria and Cytophaga/Bacteroidetes (Fig. 3),  
136 and probes Alf968 [23] and CF968 [24] were chosen for analyses of associated heterotrophic  
137 bacteria. CARD FISH analyses were computed as described in [25] with modifications: Filter  
138 pieces were doused in 0.2 % fluid agarose, dried, and subsequently incubated for 60 min at 37  
139 °C in 10 mg ml<sup>-1</sup> lysozym solution and thereafter for 15 min at 37 °C with achromopeptidase  
140 (180 U ml<sup>-1</sup>). For inactivation, filter pieces were doused subsequently to 1x PBS, autoclaved  
141 MilliQ and 99% ethanol and following placed for 10 min in 0.01 M HCl at room temperature.  
142 Hybridization with horseradish peroxidase labeled 16S rRNA probes Alf968 and CF968 were  
143 carried out at 35 °C with 55% formamide for 3.5 and 4 h, respectively. Signal amplification  
144 was achieved with Oregon green 488-X bound to tyramide as described in [26]. After

145 hybridization, filter pieces were stained with 4,6-diamidin-2-phenylindol (DAPI) solution for  
146 unspecific counter-staining of all cells.

147

## 148 2.6. Laser-Scanning Microscope, Scanning electron microscope and sputtering

149 Spots of interest were determined by fluorescence microscopy and subsequently laser marked  
150 with a laser microdissectional microscope. For confirmation of associated bacteria and  
151 cyanobacterial species, SEM analyses were performed. Therefore, filter pieces were covered  
152 with approximately 8 nm gold in a sputter coater (Cressington108 auto-sputter coater).  
153 Samples were analyzed with a Scanning electron microscope (Zeiss Merlin VP compact) with  
154 the Zeiss Smart SEM Software. Before NanoSIMS analyses, filter pieces were covered with  
155 ca. 30 nm additional gold with a sputter coater (see above).

156

## 157 2.7. NanoSIMS measurements

158 SIMS imaging was performed using a NanoSIMS 50L instrument (Cameca, France). A  $^{133}\text{Cs}^+$   
159 primary ion beam was used to erode and ionize atoms of the sample. Among the received  
160 secondary ions, images of  $^{12}\text{C}^-$ ,  $^{13}\text{C}^-$ ,  $^{12}\text{C}^{14}\text{N}^-$  and  $^{12}\text{C}^{15}\text{N}^-$  were recorded simultaneously for  
161 cells at the laser microdissectional (LMD)-marked spots using electron multipliers as  
162 detectors. The mass resolving power was adjusted to suppress interferences at all masses  
163 allowing, e.g. the separation of  $^{12}\text{C}^{15}\text{N}^-$  from interfering ions such as  $^{13}\text{C}^{14}\text{N}^-$ . Prior to the  
164 analysis, sample areas of  $30 \times 30 \mu\text{m}$  were sputtered for 2 min with 600 pA to erode the gold  
165 and reach the steady state of secondary ion formation. The primary ion beam current during  
166 the analysis was 1 pA; the scanning parameters were  $512 \times 512 \text{ px}$  for areas of  $20\text{--}30 \mu\text{m}$ , with  
167 a dwell time of  $250 \mu\text{s}$  per pixel.

168

## 169 2.8. Analyses of NanoSIMS measurements

170 All NanoSIMS measurements were analysed with the Matlab based program look@nanosims  
171 [27]. Briefly, the 60 measured planes were checked for inconsistencies and all usable planes  
172 accumulated, regions of interest (i.e. cells of cyanobacterial filaments, associated bacterial  
173 cells and filter regions without organic material for background measurements) defined based  
174 on  $^{12}\text{C}^{14}\text{N}$  mass pictures, and  $^{13}\text{C}/^{12}\text{C}$  as well as  $^{15}\text{N}/^{14}\text{N}$  ratios calculated from the ion signals  
175 for each region of interest. Measurements of heterocysts in *Aphanizomenon* sp.,  
176 *Dolichospermum* sp., and *Nodularia* sp. were avoided due their specific cell metabolism. For  
177 analyses of each measurement, first the means of background measurements were determined,  
178 and this mean factorized for theoretical background values (0.11 for  $^{13}\text{C}/^{12}\text{C}$  and 0.00367 for  
179  $^{15}\text{N}/^{14}\text{N}$ ). These factors were applied to all non-background regions of interest in the same  
180 measurement. For each time-point, values for each species (or bacterial group for the  
181 associated bacteria) were pooled (i.e. different cells in one measurement as well as different  
182 measurements) and means for each species (or bacterial group for the associated bacteria) for  
183 each time-point calculated. Work flow for an example spot from Card-FISH to NanoSIMS  
184 analyses is illustrated in Fig. 2. The numbers of measured cells per species/group and time  
185 point, as well as overall measured areas per time point are given in Supplemental 2.

186

187 Figure 2: Work flow for analyses of cyanobacteria and their associated heterotrophic bacteria.  
188 A: Card-FISH image of a *Nodularia* sp. filament with two associated Alphaproteobacteria  
189 taken with a laser microdissectional microscope. The marking arrow can be seen at the right  
190 side. B: Scanning electron microscope image of the same spot for confirmation of associated  
191 bacteria (middle-right side of the filament) and identification of *Nodularia* sp. The tip of the  
192 marking arrow can be seen at the right side of the image. C: accumulated NanoSIMS images  
193 of the same spot with blue (low) to red (high)  $^{15}\text{N}$  signal (as example). The circled areas



194 display the regions of interest, whereof  $^{13}\text{C}/^{12}\text{C}$  and  $^{15}\text{N}/^{14}\text{N}$  ratios were calculated. Control  
195 (filter without cyanobacteria or heterotrophic bacteria) regions can be seen at the top-right and  
196 down-left, *Nodularia* sp. regions are displayed in the bluish part, and the associated  
197 Alphaproteobacteria by the smaller regions in the reddish part of the image.

198

## 199 2.9. Uptake rates of $^{13}\text{C}$ and $^{15}\text{N}$

200 Uptake rates for nitrogen and carbon were calculated as described in [28] according to the  
201 equation:

$$202 \quad V(T^{-1}) = (1/\Delta t) ((A_{\text{PNf}} - A_{\text{PN0}})/(A_{\text{N2}} - A_{\text{PN0}})),$$

203 where  $A_{\text{N2}}$  is the  $^{15}\text{N}$  or  $^{13}\text{C}$  enrichment of the N or C available for fixation;  $A_{\text{PN0}}$  the  $^{15}\text{N}$  or  
204  $^{13}\text{C}$  enrichment of particulate N or C at the start of the experiment;  $A_{\text{PNf}}$ , the  $^{15}\text{N}$  or  $^{13}\text{C}$   
205 enrichment of particulate N or C at the end of the experiment; and

$$206 \quad p(\text{M L}^{-3} \text{T}^{-1}) = V/2 * \text{PX},$$

207 where PX is the concentration of N or C for the respective cyanobacterial species in the  
208 incubation bottles, or the cellular N or C content for the associated bacteria. The solubility of  
209 N and C was calculated using the Excel Sheet provided by Joe Montoya, based on [29] for  
210  $\text{CO}_2$  and [30] for  $\text{N}_2$ . For cyanobacteria gross uptake rates were calculated per volume and  
211 time, and for the associated bacteria per cell and time, because no absolute numbers of  
212 associated bacteria were existent. The C:N ratios in the cyanobacteria were assumed with 6.3  
213 [14,31]. The size of the associated bacteria was assumed with  $2 \times 1 \mu\text{m}$  (SEM analyses), the  
214 carbon content with  $0.35 \text{ pg C } \mu\text{m}^{-3}$  [32], and the C:N ratio with 5:1 [33]. We are aware that  
215 the used “bubble-method” for injection of  $\text{N}_2$  gas assumes an instantaneous equilibrium  
216 between the  $^{15}\text{N}_2$  gas bubble and the  $\text{N}_2$  dissolved in water, which in fact may be time-delayed  
217 [34], and ultimately leads to an underestimation of fixation rates. Thus, especially at the early

218 measuring points (10 and 30 min), the calculated rates should be considered as proxy values  
219 with percentage errors up to 70% [35].

220

## 221 2.10. Data analyses

222 All data were analysed with R studio [36]. To test for differences in stable isotope ratios  
223 between species/groups or between different time-points in the same group/species,  
224 ANOVAS (analyses of variance) with subsequent Tukey HSD posthoc tests with the package  
225 agricolae were performed. Likewise, the impact of the host species on the stable isotope  
226 uptake of the associated bacteria was tested with ANOVAs, by comparing associated bacterial  
227 cells from different hosts. Possible cell-to-cell transfer of  $^{13}\text{C}$  and  $^{15}\text{N}$  between host and  
228 associated bacteria were tested by calculating linear models of  $^{13}\text{C}/^{12}\text{C}$  and  $^{15}\text{N}/^{14}\text{N}$  ratios  
229 between the host cells and the associated bacterial cells for each incubation period. To test for  
230 correlations between  $^{13}\text{C}$  and  $^{15}\text{N}$  uptake, linear models were calculated with the lm function.  
231 To test for differences in relations of  $^{13}\text{C}$  to  $^{15}\text{N}$  uptake between species/groups, dissimilarity  
232 matrices (horn distances) were calculated with a xy ( $x = ^{13}\text{C}/^{12}\text{C}$ ,  $y = ^{15}\text{N}/^{14}\text{N}$ ) system, and  
233 subsequently ANOSIM analyses performed with the vegan package. To test for differences in  
234  $^{13}\text{C}/^{15}\text{N}$  uptake relations between functional groups, ANCOVAs with and without interactions  
235 between the factor and the co-variable were calculated with linear models. Here,  $^{13}\text{C}$  uptake  
236 was set as dependent variable,  $^{15}\text{N}$  uptake as co-variable, and the functional group as factor.  
237 Next, ANOVAs were calculated for both ANCOVAs to test for differences in the slopes of  
238 the linear models.

239

## 240 3. Results

### 241 3.1. Community composition of the phytoplankton and associated bacteria

242 The phytoplankton community was dominated by the cyanobacteria *Aphanizomenon* sp. (33%  
243 biomass), *Nodularia* sp. (30% biomass), *Pseudanabaena* sp. (9% biomass) and  
244 *Dolichospermum* sp. (8% biomass), which together accounted for 80% of the total biomass  
245 (Figure 3a). The most abundant associated bacteria belonged to Alphaproteobacteria (39%),  
246 Cytophaga/Bacteroidetes (20%), Gammaproteobacteria (18%), Verrucomicrobia (6%),  
247 Planctomycetes (5%), Betaproteobacteria (4%) and Actinobacteria (1%, Fig. 3b).

248 Figure 3. A: Pie chart for the most abundant phytoplankton groups (left side, in % biomass).

249 B: Pie chart for the most abundant bacterial groups (right side, in % of sequencing reads).

250 The general appearance of the bloom (Fig. 4a), and microscopy of cyanobacteria (Fig. 4b-e)  
251 both indicated a late stage of the bloom (especially the “curly” appearance of *Nodularia* sp.),  
252 with many associated bacteria to the heterocystous species (Fig. 4f).

253 Figure 4. Appearance of the bloom at the day of sampling (a), and microscopic images of  
254 *Pseudanabaena* sp. (b), *Aphanizomenon* sp. (c), *Nodularia* sp. (d), *Dolichospermum* sp. (e),  
255 and a DAPI stained sample with *Nodularia* sp. and associated bacteria.

256

### 257 3.2. Bi-carbonate uptake of cyanobacteria and associated heterotrophic bacteria

258 Significant differences in the  $^{13}\text{C}$  incorporation between the bacterial groups were observed at  
259 all sampling points (Fig. 5). *Pseudanabaena* sp. showed the highest  $^{13}\text{C}/^{12}\text{C}$  ratios at all  
260 sampling points with continuously increasing incorporation of  $^{13}\text{C}$  over time. At the early time  
261 points (10, 30 and 60 min), all other species/groups displayed a  $^{13}\text{C}/^{12}\text{C}$  ratio close to the  
262 natural occurring value of 0.011 (Fig. 5). After 6 and 24 h of incubation, however,  
263 Cytophaga/Bacteroidetes revealed the second highest  $^{13}\text{C}/^{12}\text{C}$  ratios, corresponding to  
264 significant  $^{13}\text{C}$  enhancements with a more than two- and ten-fold increase of the natural  
265 occurring ratio after 6 and 24 h, respectively (Fig. 5). Mentionable, the filamentous

| <i>Species/incubation time</i>                                                                                                      | 10 min       | 30 min      | 60 min      | 6 h         | 24 h        |
|-------------------------------------------------------------------------------------------------------------------------------------|--------------|-------------|-------------|-------------|-------------|
| <i><sup>13</sup>C uptake nmol C h<sup>-1</sup> l<sup>-1</sup> (fmol C h<sup>-1</sup> cell<sup>-1</sup> for associated bacteria)</i> |              |             |             |             |             |
| <i>Aphanizomenon sp.</i>                                                                                                            | 0.3 ± 3.52   | 0.00 ± 0.57 | 1.06 ± 2.69 | 0.41 ± 1.35 | 0.00 ± 0.02 |
| <i>Dolichospermum sp.</i>                                                                                                           | 0.06 ± 0.76  | 0.25 ± 0.71 | 0.05 ± 0.2  | 0.07 ± 0.13 | 0.27 ± 0.18 |
| <i>Nodularia sp.</i>                                                                                                                | 5.88 ± 20.28 | 0.00 ± 0.95 | 0.4 ± 1.5   | 0.19 ± 0.4  | 0.00 ± 0.03 |

266 cyanobacteria *Aphanizomenon sp.*, *Dolichospermum sp.* and *Nodularia sp.* did not display  
 267 elevated <sup>13</sup>C/<sup>12</sup>C ratios over the whole 24 h incubation period with two exceptions:  
 268 *Aphanizomenon sp.* revealed enhanced ratios after 6 h and *Dolichospermum sp.* after 24 h of  
 269 incubation (data not shown, Fig. 5). To test for a possible impact of the host-species on <sup>13</sup>C  
 270 uptake of the associated bacteria, we compared the <sup>13</sup>C/<sup>12</sup>C ratios obtained from Alphaproteo-  
 271 and Cytophaga/Bacteroidetes bacteria from different host species. In most cases, however, no  
 272 significant differences occurred between the hosts (ANOVAs, data not shown). Especially in  
 273 the 6 and 24 h exposures, where increased <sup>13</sup>C/<sup>12</sup>C ratios were obtained for both of the  
 274 associated bacterial groups (Fig. 5), no impact of the host species could be seen (data not  
 275 shown). Linear models on <sup>13</sup>C uptake between the host cells and the associated bacterial cells  
 276 did not suggest cell-cell transfer of <sup>13</sup>C except for the 60 min incubation (R<sup>2</sup> = -0.05, 0.12,  
 277 0.24, -0.03, -0.05; p = 0.84, 0.24, 0.01, 0.48, 0.75, for 10 min, 30 min, 60 min, 6 h and 24 h  
 278 incubation, respectively). The calculated uptake rates of the cyanobacteria were highest for  
 279 *Pseudanabaena sp.* after 60 min with 2.55 ± 0.91 nmol C h<sup>-1</sup> l<sup>-1</sup>, and from the associated  
 280 bacteria for Cytophaga/Bacteroidetes bacteria with 0.31 ± 0.34 fmol C h<sup>-1</sup> cell<sup>-1</sup> after 24 h of  
 281 incubation (Table 1).

282

283 Table 1: Carbon and nitrogen uptake rates ± standard deviation given in nmol C or N h<sup>-1</sup> l<sup>-1</sup>  
 284 for cyanobacteria, and fmol C or N h<sup>-1</sup> cell<sup>-1</sup> for associated bacteria.

|                                                                                                                                     |             |             |             |             |             |
|-------------------------------------------------------------------------------------------------------------------------------------|-------------|-------------|-------------|-------------|-------------|
| <i>Pseudanabaena sp.</i>                                                                                                            | 2.48 ± 1.5  | 1.98 ± 0.89 | 2.55 ± 0.91 | 1.13 ± 0.72 | 1.87 ± 1.08 |
| <i>Alphaproteo</i>                                                                                                                  | 0.59 ± 0.9  | 0.00 ± 0.04 | 0.00 ± 0.07 | 0.13 ± 0.23 | 0.2 ± 0.32  |
| <i>Cytophaga/Bacteroidetes</i>                                                                                                      | 0.12 ± 0.09 | 0.24 ± 0.45 | 0.03 ± 0.06 | 0.19 ± 0.27 | 0.31 ± 0.34 |
| <i><sup>15</sup>N uptake nmol N h<sup>-1</sup> l<sup>-1</sup> (fmol N h<sup>-1</sup> cell<sup>-1</sup> for associated bacteria)</i> |             |             |             |             |             |
| <i>Aphanizomenon sp.</i>                                                                                                            | 1.03 ± 1.6  | 0.00 ± 1.27 | 0.28 ± 0.42 | 0.17 ± 0.4  | 0.00 ± 0.02 |
| <i>Dolichospermum sp.</i>                                                                                                           | 0.73 ± 0.45 | 0.17 ± 0.3  | 0.05 ± 0.08 | 0.09 ± 0.17 | 0.04 ± 0.03 |
| <i>Nodularia sp.</i>                                                                                                                | 8.07 ± 18.4 | 0.03 ± 0.87 | 0.18 ± 0.53 | 0.19 ± 0.23 | 0.00 ± 0.02 |
| <i>Pseudanabaena sp.</i>                                                                                                            | 1.49 ± 0.47 | 0.8 ± 0.56  | 0.84 ± 0.17 | 0.48 ± 0.31 | 0.17 ± 0.05 |
| <i>Alphaproteo</i>                                                                                                                  | 0.00 ± 0.08 | 0.2 ± 0.73  | 0.31 ± 0.76 | 1.15 ± 1.29 | 0.34 ± 0.2  |
| <i>Cytophaga/Bacteroidetes</i>                                                                                                      | 0.95 ± 1.01 | 0.36 ± 0.53 | 1.2 ± 1.93  | 0.67 ± 0.92 | 0.25 ± 0.17 |

285

286 Figure 5: Boxplots of <sup>13</sup>C/<sup>12</sup>C ratios for *Aphanizomenon sp.*, *Dolichospermum sp.*, *Nodularia*  
 287 *sp.*, *Pseudanabaena sp.*, Alphaproteobacteria and Cytophaga/Bacteroidetes bacteria over time,  
 288 with square root transformed y axis. Values originate from pooled data for the respective  
 289 species from different measurements and cells (Supplemental 2). Lower case letters above the  
 290 boxplots refer to different groups of Tukey HSD Post-Hoc tests. Heterocystous cyanobacteria  
 291 are displayed in green, non-heterocystous cyanobacteria in blue, and associated heterotrophic  
 292 bacteria in red.

293

### 294 3.3. <sup>15</sup>N<sub>2</sub> uptake of cyanobacteria and associated heterotrophic bacteria

295 For all time points, significant differences of <sup>15</sup>N incorporation between the species/groups  
 296 occurred (Fig. 6). After 10 min of incubation, however, all species still showed values around  
 297 the natural <sup>15</sup>N/<sup>14</sup>N ratio of 0.00367 (Fig. 6), whereas after 30 min *Pseudanabaena sp.* (which  
 298 reveals the highest <sup>15</sup>N incorporation), and the associated heterotrophic bacteria showed

299 enhanced  $^{15}\text{N}/^{14}\text{N}$  ratios (Fig. 6). Between 1 and 6 h of incubation especially the  
300 Alphaproteobacteria increased their  $^{15}\text{N}/^{14}\text{N}$  ratios, and after 24 h of incubation pronounced  
301 differences between the species occurred, with associated Alphaproteobacteria showing the  
302 highest  $^{15}\text{N}$  incorporation (mean =  $0.0143 \pm 0.0059$ , almost 4-times increased  $^{15}\text{N}/^{14}\text{N}$  ratios  
303 compared to the natural ratio). In general, after 24 h of incubation the associated bacteria  
304 revealed the highest ratios, followed by *Pseudanabaena* sp., whereas the heterocystous  
305 cyanobacteria displayed even after 24 h of incubation  $^{15}\text{N}/^{14}\text{N}$  ratios close to the natural value  
306 (Fig. 6).

307 Figure 6: Boxplots of  $^{15}\text{N}/^{14}\text{N}$  ratios for *Aphanizomenon* sp., *Dolichospermum* sp., *Nodularia*  
308 sp., *Pseudanabaena* sp., Alphaproteobacteria and Cytophaga/Bacteroidetes bacteria over time  
309 with square root transformed y-axis. Values originate from pooled data for the respective  
310 species from different spots and cells (Supplemental 2). Lower case letters above the boxplots  
311 refer to different groups of Tukey HSD Post-Hoc tests. Heterocystous cyanobacteria are  
312 displayed in green, non-heterocystous cyanobacteria in blue, and associated heterotrophic  
313 bacteria in red.

314

315 Comparisons of the  $^{15}\text{N}/^{14}\text{N}$  ratios in each species/group between different incubation times  
316 revealed significant  $^{15}\text{N}$  incorporation in most species/groups, but inconsistent  $^{15}\text{N}$  uptake in  
317 the heterocystous species (Fig. 6). In general, the heterocystous cyanobacteria do not display  
318 pronounced  $^{15}\text{N}_2$  uptake over time. In contrast, *Pseudanabaena* sp. displays significantly  
319 enhanced  $^{15}\text{N}/^{14}\text{N}$  ratios from 6 h of incubation onwards (Anova,  $F = 65.43$ ,  $p < 0.0001$ ), with  
320 steadily increasing values over time and significant differences also between 6 and 24 h of  
321 incubation (Fig. 6, Post-Hoc data not shown). Also Alphaproteobacteria and  
322 Cytophaga/Bacteroidetes reveal steadily increasing  $^{15}\text{N}/^{14}\text{N}$  ratios over the 24 h incubation  
323 period (Anova,  $F = 4.87$ ,  $p = 0.003$ , and  $F = 9.811$ ,  $p < 0.0001$ , respectively), with significant

324 differences between almost all incubation times (Fig. 6, Post-Hoc data not shown). The  
325 separation of the obtained  $^{15}\text{N}/^{14}\text{N}$  values of associated Alphaproteo- and  
326 Cytophaga/Bacteroidetes bacteria by the host species did not reveal differences between the  
327 host species (data not shown). Linear models between the  $^{15}\text{N}/^{14}\text{N}$  ratios of heterocystous  
328 cyanobacterial cells that carry associated bacteria and the associated bacteria did not suggest  
329 dependencies of  $^{15}\text{N}$  uptake between the host and the associated bacterium, with the exception  
330 of 30 min incubation ( $R^2 = -0.02, 0.64, 0.08, -0.03, 0.1$ ;  $p = 0.48, 0.02, 0.1, 0.39, 0.1$  for 10  
331 min, 30 min, 1h, 6 h, and 24 h incubation, respectively). The uptake rates were highest for  
332 *Nodularia* sp. with  $8.07 \pm 18.4 \text{ nmol N h}^{-1} \text{ l}^{-1}$  after 10 min of incubation. However, if  
333 excluding the 10 min incubation due to experimental uncertainties, *Pseudanabaena* sp.  
334 revealed the highest incorporation rates with  $0.84 \pm 0.17 \text{ nmol N h}^{-1} \text{ l}^{-1}$  after 1 h of incubation.  
335 For the associated bacteria Cytophaga/Bacteroidetes displayed the highest incorporation of  
336  $^{15}\text{N}$  with  $1.2 \pm 1.93 \text{ fmol N h}^{-1} \text{ cell}^{-1}$  after 1 h incubation (Table 1).

337

#### 338 3.4. Species- and group specific relations of $^{13}\text{C}$ to $^{15}\text{N}$ uptake

339 Significant differences between the species/bacterial groups occurred for all time points for  
340 relations of  $^{13}\text{C}$  against  $^{15}\text{N}$  uptake (ANOSIM, each  $p = 0.001$ ), although different R values  
341 were obtained for different exposure times ( $R = 0.2387, 0.4203, 0.3098, 0.215, 0.585$ , for 10,  
342 30, 60 min, 6 and 24 h exposure, respectively), indicating most pronounced differences in the  
343 relation of  $^{13}\text{C}$  to  $^{15}\text{N}$  uptake between the species/groups after 24 h of incubation. In general,  
344 *Pseudanabaena* sp. was the most noticeable species in the  $^{13}\text{C}$  uptake (starting with the 30  
345 min exposure), and the associated Alphaproteo and Cytophaga/Bacteroidetes bacteria in the  
346  $^{15}\text{N}$  uptake (starting after 60 min of exposure, Fig. 7). The heterocystous cyanobacteria  
347 revealed a high patchiness with few cells displaying prominent  $^{13}\text{C}$  uptake (Fig. 5), but mostly  
348 did not show obvious uptake of either  $^{13}\text{C}$  or  $^{15}\text{N}$  (Fig. 7, Table 1). Pooling the different

349 species (for bacteria groups) into the functional groups heterocystous cyanobacteria  
350 (*Aphanizomenon* sp., *Dolichospermum* sp., and *Nodularia* sp.), non-heterocystous  
351 cyanobacteria (*Pseudanabaena* sp.), and associated bacteria (Alphaproteo- and  
352 Cytophaga/Bacteroidetes bacteria), and plotting of the  $^{13}\text{C}/^{12}\text{C}$  and  $^{15}\text{N}/^{14}\text{N}$  ratios against the  
353 time, revealed specific tasks of the functional groups (Fig. 7, Table 2). The associated bacteria  
354 predominantly display enhanced  $^{15}\text{N}/^{14}\text{N}$  ratios, with the highest ratios after 6 h incubation,  
355 whereas non-heterocystous cyanobacteria reveal the highest  $^{13}\text{C}/^{12}\text{C}$  ratios with a time  
356 dependent increase. Controversially, only few heterocystous cyanobacteria show increased  
357  $^{13}\text{C}/^{12}\text{C}$  and/or  $^{15}\text{N}/^{14}\text{N}$  ratios (Fig. 7).

358 Figure 7:  $^{13}\text{C}/^{12}\text{C}$  (z axis) and  $^{15}\text{N}/^{14}\text{N}$  (y axis) ratios plotted against the exposure time (log  
359 transformed x axis) for the different functional groups (heterocystous cyanobacteria, non-  
360 heterocystous cyanobacteria, associated bacteria). The color and symbol legend is given  
361 directly in the figure.

362

363 Group specific behavior was corroborated by significantly different slopes between the  
364 functional groups in regression analyses of the  $^{13}\text{C}$  over  $^{15}\text{N}$  uptake for the different exposure  
365 times, despite the fact that significant correlations between  $^{13}\text{C}$  and  $^{15}\text{N}$  uptake occurred for all  
366 groups (Table 2). From 60 min of exposure onwards, the slopes of the associated bacteria are  
367 by far the steepest, corresponding to a predominant incorporation of  $^{15}\text{N}$ , whereas non-  
368 heterocystous cyanobacteria reveal flat slopes accompanying predominant incorporation of  
369  $^{13}\text{C}$  (Table 2).

370

371 Table 2: Regression analyses of  $^{13}\text{C}$  over  $^{15}\text{N}$  uptake for the functional groups heterocystous  
372 cyanobacteria (*Aphanizomenon* sp., *Dolichospermum* sp., *Nodularia* sp.), associated bacteria



373 (Alphaproteo and Cytophaga/Bacteroidetes bacteria), and non-heterocystous cyanobacteria  
 374 (*Pseudanabaena* sp.) for the different incubation times. Anova results display comparisons of  
 375 regression slopes of the different functional groups (ANCOVAs with and without interactions  
 376 between the factor (functional group) and the co-variable ( $^{15}\text{N}$  uptake) were calculated with  
 377 linear models, with  $^{13}\text{C}$  uptake set as dependent variable. ANOVAs were then calculated  
 378 between both ANCOVAs to test for differences in the regression slopes).  
 379

| <i>Incubation time</i>                 | <i>10 min</i>                                       | <i>30 min</i>                                       | <i>60 min</i>                                      | <i>6 h</i>                                          | <i>24 h</i>                                        |
|----------------------------------------|-----------------------------------------------------|-----------------------------------------------------|----------------------------------------------------|-----------------------------------------------------|----------------------------------------------------|
| <i>Heterocystous cyanobacteria</i>     | Y=0.001+0.246x,<br>R <sup>2</sup> =0.88,<br>p=0.000 | Y=0.004-0.024x,<br>R <sup>2</sup> =0.00,<br>p=0.308 | Y=0.001+0.03x,<br>R <sup>2</sup> =0.16,<br>p=0.000 | Y=0.002+0.149x,<br>R <sup>2</sup> =0.82,<br>p=0.000 | Y=0.00+0.01x,<br>R <sup>2</sup> =0.56,<br>p=0.000  |
| <i>Associated bacteria</i>             | Y=0.004+0.018x,<br>R <sup>2</sup> =0.02,<br>p=0.471 | Y=0.003+0.105x,<br>R <sup>2</sup> =0.45,<br>p=0.06  | Y=-0.02+1.94x,<br>R <sup>2</sup> =0.52,<br>p=0.000 | Y=0.004+0.329x,<br>R <sup>2</sup> =0.4,<br>p=0.007  | Y=0.015-0.022x,<br>R <sup>2</sup> =0.24,<br>p=0.02 |
| <i>Non-heterocystous cyanobacteria</i> | Y=0.004+0.028x,<br>R <sup>2</sup> =0.04,<br>p=0.169 | Y=0.003+0.105x,<br>R <sup>2</sup> =0.28,<br>p=0.02  | Y=0.004+0.05x,<br>R <sup>2</sup> =0.72,<br>p=0.001 | Y=0.003+0.117x,<br>R <sup>2</sup> =0.82,<br>p=0.000 | Y=0.009-0.002x,<br>R <sup>2</sup> =0.02,<br>p=0.27 |
| <i>Anova</i>                           | F=2.77, p=0.066                                     | F=5.69, p=0.001                                     | F=12.9, p=0.000                                    | F=60.42, p=0.000                                    | F=9.79, p=0.000                                    |

380

#### 381 4. Discussion:

382 The present study determined the specific contribution of four different cyanobacterial species  
 383 and the two most abundant associated bacterial groups in carbon as well as nitrogen fixation  
 384 and cycling in late stage cyanobacterial bloom associations. Altogether, the cyanobacterium  
 385 *Pseudanabaena* spp. dominated the carbon assimilation as well as nitrogen fixation at the  
 386 early time-points, and the associated Alphaproteo- and Cytophaga/Bacteroidetes bacteria the  
 387 nitrogen cycling and possibly  $\text{N}_2$  fixation at the later time-points. The filamentous,

388 heterocystous cyanobacteria *Nodularia* sp., *Dolichospermum* sp., and *Aphanizomenon* sp. on  
389 the other hand, either showed no or erratic carbon and nitrogen uptake. Among the associated  
390 heterotrophic bacteria Cytophaga/Bacteroidetes were more active in the carbon cycling,  
391 whereas Alphaproteobacteria revealed higher activity in nitrogen cycling. However, high  
392 intra-species variability was observed in all examined species, which partly impeded  
393 significant differences in isotope uptake between species and time points.

394

#### 395 4.1. Bi-carbonate uptake of cyanobacteria and associated heterotrophic bacteria

396 Surprisingly, *Pseudanabaena* sp. and not the heterocystous cyanobacteria was the most  
397 prominent species in carbon assimilation (Fig. 3), with fixation rates up to 2.55 nmol C h<sup>-1</sup> l<sup>-1</sup>.  
398 Indeed, carbon fixation rates of *Pseudanabaena* sp. were much higher than the rates for the  
399 heterocystous species *Aphanizomenon* sp., *Dolichospermum* sp., and *Nodularia* sp. together  
400 (Table 1, exception after 10 min of incubation due to 3 extraordinary high measurements in  
401 *Nodularia* sp.). However, in combined measurements of June, July and August in the  
402 preceding seasons 2012 and 2013, the three heterocystous species together accounted for ca.  
403 5-250 nmol C h<sup>-1</sup> l<sup>-1</sup> (Klawonn et al., 2016). Thus, the heterocystous cyanobacteria still hold  
404 key roles in carbon fixation in the Baltic Sea [14,37], with much higher fixation rates  
405 compared to the estimated ones of *Pseudanabaena* sp. in the present study. In our case, the  
406 appearance of the bloom and the curly phenotype of *Nodularia* sp. suggested a late stage of  
407 the bloom (Fig. 4), and the low activity of *Aphanizomenon* sp., *Dolichospermum* sp., and  
408 *Nodularia* sp. cells might be attributed to inactive cells at the late bloom stage.  
409 *Pseudanabaena* sp. was still active and may be adapted to this situation where P-supply by  
410 degrading blooms may be granted.

411 Measurements of heterotrophic bacteria at the later incubation times also revealed enhanced  
412 <sup>13</sup>C/<sup>12</sup>C ratios (Fig. 5), and heterotrophic bacteria may also incorporate bi-carbonate [38].

413 However, the  $^{13}\text{C}$  signal in heterotrophic bacteria arises after 6 h incubation which may be  
414 related to recycled organic carbon released by *Pseudanabaena* sp. and other cells. The higher  
415 proportion of Cytophaga/Bacteroidetes bacteria in the incorporation of  $^{13}\text{C}$  compared to  
416 Alphaproteobacteria (Fig. 5) fits the current knowledge on their ecology: Marine  
417 Cytophaga/Bacteroidetes are specialized in the degradation of high molecular weight  
418 compounds (Fernández-Gómez et al., 2013; Kirchman, 2002; Alonso et al., 2012), which are  
419 especially exuded in high quantities in late stage and senescent blooms (Mühlenbruch et al.  
420 2018; Seymour et al., 2017; Pinhassi et al., 2004). Alphaproteobacteria on the other hand  
421 preferentially use low molecular weight compounds such as amino acids [40] and may act  
422 complementary to Bacteroidetes/Cytophaga in cyanobacterial bloom associations [39]. Thus,  
423 the higher  $^{13}\text{C}$  incorporation in Cytophaga/Bacteroidetes bacteria may display the recycling of  
424 complex organic material whereas the lower signal in the Alphaproteobacteria account for the  
425 incorporation of low molecular weight exudates.

426

#### 427 4.2. $^{15}\text{N}_2$ uptake of cyanobacteria and associated heterotrophic bacteria

428 *Pseudanabaena* sp. showed  $^{15}\text{N}_2$  incorporation after 30 min of incubation, and was the only  
429 species with significantly increased  $^{15}\text{N}/^{14}\text{N}$  ratios at this time. Further, it was the species with  
430 the highest  $^{15}\text{N}/^{14}\text{N}$  ratios after 60 min of incubation (Fig. 6). Until now, the non-  
431 heterocystous *Pseudanabaena* sp. was not shown to be involved in fixation of atmospheric  
432 nitrogen in the Baltic Sea [13,14], despite the presence of nitrogenase genes [15]. However,  
433 picocyanobacteria and non-heterocystous filamentous species were suspected for nitrogen  
434 fixation under specific conditions before [14]. Taking into account that *Pseudanabaena* sp.  
435 was the only species with increased  $^{15}\text{N}/^{14}\text{N}$  ratios at the early sampling points, our data  
436 suggest an active  $\text{N}_2$  fixation by *Pseudanabaena* sp., with fixation rates between 0.17 and 1.49  
437  $\text{nmol N h}^{-1} \text{ l}^{-1}$  (Table 1). Thus, at this late stage of the bloom, *Pseudanabaena* sp. might have

438 been responsible for the input of reactive nitrogen in the multi-species associations and  
439 ultimately into the nitrogen cycle of the Baltic Sea. Indeed, if converted to per cell rates,  
440 nitrogen fixation of *Pseudanabaena* sp. appears low with up to 0.07 fmol N cell<sup>-1</sup> h<sup>-1</sup> if  
441 compared to the heterocystous species *Nodularia spumigena* (11 fmol N cell<sup>-1</sup> h<sup>-1</sup>, Ploug et al.,  
442 2011) and *Aphanizomenon* sp. (1-11 fmol N cell<sup>-1</sup> h<sup>-1</sup>, Ploug et al., 2010). However, this  
443 difference might be attributed to the much smaller cell size of *Pseudanabaena* sp., and  
444 compensated by higher cell numbers. In a comparably study of a Baltic Sea cyanobacterial  
445 bloom, cumulative fixation rates for combined measurements of June, July and August of the  
446 heterocystous species *Dolichospermum* sp., *Nodularia* sp., and *Aphanizomenon* sp. were  
447 determined with ca. 0.5-80 nmol N l<sup>-1</sup> h<sup>-1</sup> [14], i.e. approximately one dimension above that of  
448 *Pseudanabaena* sp. alone in the present study. Likewise to the carbon fixation, the inexistent  
449 nitrogen fixation of the heterocystous species in our study may be attributed to different  
450 stages of the blooms, with most cells of heterocystous species being inactive at the late stage  
451 of the bloom (Figs. 5 and 6). Congenial to these results, early/mid-summer nitrogen fixation  
452 rates in the Baltic Sea were up to 30 times higher compared to late summer [8]. Thus,  
453 heterocystous cyanobacteria may still be the prime nitrogen fixers in the Baltic Sea [5,6], but  
454 the possible participation of *Pseudanabaena* spp. should not be neglected. If this temporal  
455 divided nitrogen fixation between different cyanobacterial species represents a general feature  
456 for the Baltic Sea needs to be investigated in consecutive studies.

457 The overall highest <sup>15</sup>N/<sup>14</sup>N ratios by the associated bacteria after 6 and 24 h of exposure are  
458 surprising, taking the high abundance of diazotrophic cyanobacteria and the low <sup>15</sup>N  
459 incorporation of the hosts into account. Indeed, one would expect the converse role allocation,  
460 where associated heterotrophic bacteria reveal lower <sup>15</sup>N/<sup>14</sup>N ratios than their diazotrophic  
461 hosts (Adam et al., 2016; Ploug et al., 2011). However, our high <sup>15</sup>N/<sup>14</sup>N ratios were obtained  
462 after 6 and 24 h of incubation, and thus, similar to the <sup>13</sup>C incorporation, the associated

463 bacteria may have used recycled nitrogen that was originally fixed by cyanobacteria.  
464 Supporting this assumption, heterotrophic microorganisms in cyanobacterial associations  
465 dominated by *Aphanizomenon* sp. relied on recycled nitrogen [43], and *Aphanizomenon* sp.  
466 was shown to release up to 35% of the fixed nitrogen as  $\text{NH}_4^+$  [7]. However, direct cell to cell  
467 transmission between hosts and associated bacteria was not indicated (see 3.2 and the linear  
468 models), and release and transfer of newly fixed  $\text{N}_2$  was not indicated at a similar experiment  
469 during 12 h of incubation [14].

470 The role of heterotrophic bacteria in nitrogen fixation budgets for aquatic ecosystem were  
471 recently brought into focus (Bentzon-Tilia et al., 2015; Farnelid et al., 2013), and might have  
472 been underestimated in preceding studies [44–46]. As examples, heterotrophic organisms  
473 dominated the nitrogen fixation in the South Pacific Gyre [45], and were also the principle  
474 nitrogen fixing organisms in a Baltic Sea estuary [17]. Indeed, there are hints that the  
475 associated bacteria in our study also performed nitrogen fixation themselves and not only used  
476 nitrogen released from other cells: First, if the associated bacteria would only recycle nitrogen  
477 that was fixed by other organisms, one would expect a dilution in the  $^{15}\text{N}/^{14}\text{N}$  ratios from the  
478 primary fixer to the secondary user [8,14,43], which is not the case (Figs. 6 and 7). Second,  
479 already after 30 min heterotrophic bacterial cells possessed the overall highest  $^{15}\text{N}/^{14}\text{N}$  ratios  
480 (Fig. 7), and this fast incorporation indicates active nitrogen fixation. Third, many  
481 Alphaproteobacteria (Delmont et al., 2018; Bentzon-Tilia et al., 2015; Farnelid et al., 2013)  
482 and Cytophaga/Bacteroidetes bacteria [47] possess nitrogenase genes, and are capable of  
483 nitrogen fixation. To validate heterotrophic nitrogen fixation we performed a gene functional  
484 analysis with the 16S data of the associated bacteria using paprica - PAtchway PRediction by  
485 phylogenetic plAcement [48]. In this analysis, however, only 1.2% of the associated bacteria  
486 yielded the full pathway (via ferredoxin) for nitrogen fixation (Supplemental 3) which does  
487 not support our assumption. Nevertheless, ecosystem key functions may be performed by low

488 abundant bacteria [49,50], and the per cell fixation rates of the associated bacteria were more  
489 than one dimension higher compared to *Pseudanabaena* sp. (1.2 vs 0.07 fmol N h<sup>-1</sup> cell<sup>-1</sup>), and  
490 in the same dimension as uptake rates for the much bigger heterocystous cyanobacteria (0.1 –  
491 32.7 fmol N cell<sup>-1</sup> h<sup>-1</sup>) in the Baltic Sea [14]. Thus, given the high abundances of associated  
492 bacteria, heterotrophic nitrogen fixation might contribute significantly to bulk fixation at this  
493 late stage bloom. At this stage of the bloom, senescent phytoplankton exhibit high exudation  
494 and leaking rates (e.g. Mühlenbruch et al., 2018), and create an environment with high levels  
495 of labile DOC that fuels heterotrophic nitrogen fixation [44,52,53]. This is corroborated with  
496 the linear models, where bacteria associated to inactive, senescent hosts showed the highest  
497 <sup>15</sup>N uptake (data not shown). However, until now prerequisites and regulation of heterotrophic  
498 nitrogen fixation as well as principle contradictions as fixation in oxygenated waters and at  
499 high nitrate and ammonium concentrations are poorly understood [44], and should move into  
500 the focus of upcoming studies.

501

#### 502 4.3. Relation of <sup>13</sup>C to <sup>15</sup>N uptake

503 Significant correlations between <sup>13</sup>C and <sup>15</sup>N uptake occurred in most species and at most time  
504 points (Table 2), which is in accordance with similar studies from cyanobacterial blooms in  
505 the Baltic Sea (e.g. Klawonn et al., 2016). Nevertheless, relations between carbon and  
506 nitrogen uptake indicated specific tasks of functional groups (Fig 7, Table 2). *Pseudanabaena*  
507 sp. (non-heterocystous cyanobacterium) clearly dominated the <sup>13</sup>C uptake (Fig. 5) throughout  
508 the whole incubation period, but was also the first species with increased <sup>15</sup>N signals (Fig. 6).  
509 For the <sup>15</sup>N/<sup>14</sup>N ratios, however, *Pseudanabaena* sp. was outpaced by the associated bacteria  
510 from 6 h incubation onwards (Fig. 6), and revealed much lower per cell fixation rates (see  
511 above). Thus, the associated bacteria may have dominated the nitrogen cycling and possibly  
512 fixation at the later sampling points. This specification of functional groups was corroborated

513 by significant different slopes in linear models calculated for correlations between  $^{13}\text{C}$  and  $^{15}\text{N}$   
514 uptake (Table 2). The formation of distinct functional groups by different species in late stage  
515 bloom associations may ultimately result in the allocation of desired metabolic pathways to  
516 every member in the association, including members unable to perform these tasks [54,55].  
517 The concerted action of diverse ecological functions by different functional groups was also  
518 proposed for a chlorophyte and its prokaryotic epiflora [56], and might be a general feature of  
519 multi-species associations.

520

521 Acknowledgements: This work was supported by the Leibniz Association and a grant of the  
522 Human Frontiers Science Program (RGP0020/2016). We thank Annett Grützmüller for  
523 NanoSIMS measurements, the field station Askö laboratory for provision of lab space and  
524 permission of experiments, Susanne Busch and Regina Hansen for phytoplankton counting,  
525 and Joe Montoya for the provision of the Excel Sheet for calculations of uptake rates. The  
526 SIMS instrument was funded by the German Federal Ministry of Education and Research  
527 (BMBF), grant identifier 03F0626A.

528

## 529 References

- 530 1. Wasmund N. Occurrence of cyanobacterial blooms in the Baltic Sea in relation to  
531 environmental conditions. *Int Rev der gesamten Hydrobiol und Hydrogr.* 1997;82:  
532 169–184. doi:10.1002/iroh.19970820205
- 533 2. Wasmund N, Voss M, Lochte K. Evidence of nitrogen fixation by non-heterocystous  
534 cyanobacteria in the Baltic Sea and re-calculation of a budget of nitrogen fixation. *Mar*  
535 *Ecol Prog Ser.* 2001;214: 1–14. doi:10.3354/meps214001

- 536 3. Stal LJ, Staal M, Villbrandt M. Nutrient control of cyanobacterial blooms in the Baltic  
537 Sea. *Aquat Microb Ecol.* 1999;18: 165–173.
- 538 4. Bianchi TS, Westman P, Rolff C. Cyanobacterial blooms in the Baltic Sea: Natural or  
539 human induced? *Limnol Oceanogr.* 2000;43: 716–726.
- 540 5. Stolte W, Balode M, Carlsson P, Grzebyk D, Janson S, Lips I, et al. Stimulation of  
541 nitrogen-fixing cyanobacteria in a Baltic Sea plankton community by land-derived  
542 organic matter or iron addition. *Mar Ecol Prog Ser.* 2006;327: 71–82.
- 543 6. Wasmund N, Nausch G, Schneider B, Nagel K, Voss M. Comparison of nitrogen fixation  
544 rates determined with different methods : a study in the Baltic Proper. *Mar Ecol Prog*  
545 *Ser.* 2005;297: 23–31.
- 546 7. Ploug H, Musat N, Adam B, Moraru CL, Lavik G, Vagner T, et al. Carbon and nitrogen  
547 fluxes associated with the cyanobacterium *Aphanizomenon* sp. in the Baltic Sea. *ISME*  
548 *J.* Nature Publishing Group; 2010;4: 1215–23. doi:10.1038/ismej.2010.53
- 549 8. Ohlendieck U, Stuhr A, Siegmund H. Nitrogen fixation by diazotrophic cyanobacteria in  
550 the Baltic Sea and transfer of the newly fixed nitrogen to picoplankton organisms. *J*  
551 *Mar Syst.* 2000;25: 213–219. doi:10.1016/S0924-7963(00)00016-6
- 552 9. Cole JJ. Interactions between bacteria and algae in aquatic ecosystems. *Annu Rev Ecol*  
553 *Syst.* 1982;13: 291–314.
- 554 10. Ramanan R, Kang Z, Kim B, Cho D, Jin L, Oh H, et al. Phycosphere bacterial diversity in  
555 green algae reveals an apparent similarity across habitats. *ALGAL.* Elsevier B.V. ;  
556 2015;8: 140–144. doi:10.1016/j.algal.2015.02.003
- 557 11. Seymour JR, Amin SA, Raina J-B, Stocker R. Zooming in on the phycosphere: the



- 558 ecological interface for phytoplankton–bacteria relationships. *Nat Microbiol.* 2017;2:  
559 17065. doi:10.1038/nmicrobiol.2017.65
- 560 12. Walsby AE, Hayes PK, Boje R, Walsby AE, Hayes PK, Boje R. The gas vesicles , buoyancy  
561 and vertical distribution of cyanobacteria in the Baltic Sea. *Eur J Phycol.* 1995;30: 87–  
562 94. doi:10.1080/09670269500650851
- 563 13. Bauersachs T, Schouten S, Compaore J, Wollenzien U, Stal LJ, Damste JSS. Nitrogen  
564 isotopic fractionation associated with growth on dinitrogen gas and nitrate by  
565 cyanobacteria. *Limnol Oceanogr.* 2009;54: 1403–1411.
- 566 14. Klawonn I, Nahar N, Walve J, Andersson B. Cell-specific nitrogen- and carbon-fixation  
567 of cyanobacteria in a temperate marine system ( Baltic Sea ). 2016;18: 4596–4609.  
568 doi:10.1111/1462-2920.13557
- 569 15. Acinas SG, Haverkamp THA, Huisman J, Stal LJ. Phenotypic and genetic diversification  
570 of *Pseudanabaena* spp. (cyanobacteria). *ISME J.* 2009;3: 31–46.  
571 doi:10.1038/ismej.2008.78
- 572 16. Farnelid H, Bentzon-Tilia M, Andersson AF, Bertilsson S, Jost G, Labrenz M, et al. Active  
573 nitrogen-fixing heterotrophic bacteria at and below the chemocline of the central  
574 Baltic Sea. *ISME J.* 2013;7: 1413–23. doi:10.1038/ismej.2013.26
- 575 17. Bentzon-Tilia M, Traving SJ, Mantikci M, Knudsen-Leerbeck H, Hansen JLS, Markager S,  
576 et al. Significant N<sub>2</sub> fixation by heterotrophs, photoheterotrophs and heterocystous  
577 cyanobacteria in two temperate estuaries. *ISME J.* 2015;9: 273–285.  
578 doi:10.1038/ismej.2014.119
- 579 18. Ploug H, Adam B, Musat N, Kalvelage T, Lavik G, Wolf-Gladrow D, et al. Carbon,

- 580 nitrogen and O<sub>2</sub> fluxes associated with the cyanobacterium *Nodularia spumigena* in  
581 the Baltic Sea. *ISME J. Nature Publishing Group*; 2011;5: 1549–58.  
582 doi:10.1038/ismej.2011.20
- 583 19. Willén T. Studies on the Phytoplankton of Some Lakes Connected with or Recently  
584 Isolated from the Baltic. *Oikos*. [Nordic Society Oikos, Wiley]; 1962;13: 169–199.  
585 doi:10.2307/3565084
- 586 20. Weinbauer MG, Fritz I, Wenderoth DF, Höfle MG. Simultaneous extraction from  
587 bacterioplankton of total RNA and DNA suitable for quantitative structure and  
588 function analyses. *Appl Environ Microbiol*. 2002;68: 1082–1087.  
589 doi:10.1128/AEM.68.3.1082
- 590 21. Herlemann DP, Labrenz M, Jürgens K, Bertilsson S, Waniek JJ, Andersson AF.  
591 Transitions in bacterial communities along the 2000 km salinity gradient of the Baltic  
592 Sea. *ISME J*. 2011;5: 1571–9. doi:10.1038/ismej.2011.41
- 593 22. Eigemann F, Schulz-Vogt HN. Stable and labile associations of microorganisms with  
594 the cyanobacterium *Nodularia spumigena*. *Aquat Microb Ecol*. 2019; 3354.  
595 doi:<https://doi.org/10.3354/ame01918>
- 596 23. Glöckner FO, Fuchs BM, Glo FO, Amann R. Bacterioplankton Compositions of Lakes  
597 and Oceans : a First Comparison Based on Fluorescence In Situ Hybridization  
598 Bacterioplankton Compositions of Lakes and Oceans : a First Comparison Based on  
599 Fluorescence In Situ Hybridization. 1999;
- 600 24. Acinas SG, Ferrera I, Sarmiento H, Díez-Vives C, Forn I, Ruiz-González C, et al.  
601 Validation of a new catalysed reporter deposition-fluorescence in situ hybridization  
602 probe for the accurate quantification of marine Bacteroidetes populations. *Environ*

- 603 Microbiol. 2015;17: 3557–3569. doi:10.1111/1462-2920.12517
- 604 25. Pernthaler A, Pernthaler J, Amann R. Fluorescence In Situ Hybridization and Catalyzed  
605 Reporter Deposition for the Identification of Marine Bacteria Fluorescence In Situ  
606 Hybridization and Catalyzed Reporter Deposition for the Identification of Marine  
607 Bacteria. 2002;68. doi:10.1128/AEM.68.6.3094
- 608 26. Musat N, Foster R, Vagner T, Adam B, Kuypers MMM. Detecting metabolic activities in  
609 single cells, with emphasis on nanoSIMS. FEMS Microbiol Rev. 2012;36: 486–511.  
610 doi:10.1111/j.1574-6976.2011.00303.x
- 611 27. Polerecky L, Adam B, Milucka J, Musat N, Vagner T, Kuypers MMM. Look@NanoSIMS -  
612 a tool for the analysis of nanoSIMS data in environmental microbiology. Environ  
613 Microbiol. 2012;14: 1009–1023. doi:10.1111/j.1462-2920.2011.02681.x
- 614 28. Montoya JP, Voss M, Kahler P, Capone DG. A Simple, High-Precision, High-Sensitivity  
615 Tracer Assay for N( $\text{inf}2$ ) Fixation. Appl Environ Microbiol. 1996;62: 986–93. Available:  
616 <http://www.pubmedcentral.nih.gov/articlerender.fcgi?artid=1388808&tool=pmcentr>  
617 [ez&rendertype=abstract](http://www.pubmedcentral.nih.gov/articlerender.fcgi?artid=1388808&tool=pmcentr&rendertype=abstract)
- 618 29. Carpenter J. New measurements of oxygen solubility in pure and natural water.  
619 Limnol Oceanogr. 1966;11: 264–277.
- 620 30. Weiss R. The solubility of nitrogen, oxygen and argon in water and seawater. Deep  
621 Res. 1970;17: 721–735.
- 622 31. Sveden JS, Adam B, Walve J, Nahar N, Sved JB, Musat N, et al. High cell-specific rates  
623 of nitrogen and carbon fixation by the cyanobacterium *Aphanizomenon* sp. at low  
624 temperatures in the Baltic Sea. FEMS Microbiol Ecol. 2015;91: 1–10.

625 doi:10.1093/femsec/fiv131

626 32. Heinänen AP. Bacterial numbers , biomass and productivity in the Baltic Sea: a cruise  
627 study. *Mar Ecol Prog Ser.* 1991;70: 283-290.

628 33. Kroer N, Jorgensen NOG, Coffin RB. Utilization of dissolved nitrogen by heterotrophic  
629 bacterioplankton: A comparison of three ecosystems. *Appl Environ Microbiol.*  
630 1994;60: 4116–4123.

631 34. Mohr W, Grosskopf T, Wallace DWR, LaRoche J. Methodological underestimation of  
632 oceanic nitrogen fixation rates. *PLoS One.* 2010;5: e12583.

633 doi:10.1371/journal.pone.0012583

634 35. Wannicke N, Benavides M, Dalsgaard T, Dippner JW, Montoya JP, Voss M. New  
635 Perspectives on Nitrogen Fixation Measurements Using  $^{15}\text{N}_2$  Gas. *Front Mar Sci.*  
636 2018;5: 1–10. doi:10.3389/fmars.2018.00120

637 36. RStudio Team. RStudio: Integrated Development for R. Boston, MA URL

638 <http://www.rstudio.com/>. 2015; 2015.

639 37. Stal LJ, Albertano P, Bergman B, Von Bröckel K, Gallon JR, Hayes PK, et al. BASIC: Baltic  
640 Sea cyanobacteria. An investigation of the structure and dynamics of water blooms of  
641 cyanobacteria in the Baltic Sea - Responses to a changing environment. *Cont Shelf*  
642 *Res.* 2003;23: 1695–1714. doi:10.1016/j.csr.2003.06.001

643 38. Hesselsoe M, Nielsen JL, Roslev P, Nielsen PH. Isotope Labeling and

644 Microautoradiography of Active Heterotrophic Bacteria on the Basis of Assimilation of  
645  $^{14}\text{CO}_2$  Isotope Labeling and Microautoradiography of Active Heterotrophic Bacteria  
646 on the Basis of Assimilation of  $^{14}\text{CO}_2$ . 2005;71: 646–655. doi:10.1128/AEM.71.2.646

- 647 39. Fernández-Gómez B, Richter M, Schüler M, Pinhassi J, Acinas SG, González JM, et al.  
648 Ecology of marine Bacteroidetes: a comparative genomics approach. *ISME J.* 2013;7:  
649 1026–1037. doi:10.1038/ismej.2012.169
- 650 40. Kirchman DL. The ecology of Cytophaga&#128;&#147;Flavobacteria in aquatic  
651 environments. *FEMS Microbiol Ecol.* 2002;39: 91–100. doi:10.1111/j.1574-  
652 6941.2002.tb00910.x
- 653 41. Alonso C, Musat N, Adam B, Kuypers M, Amann R. HISH-SIMS analysis of bacterial  
654 uptake of algal-derived carbon in the Río de la Plata estuary. *Syst Appl Microbiol.*  
655 Elsevier GmbH.; 2012;35: 541–548. doi:10.1016/j.syapm.2012.08.004
- 656 42. Ploug H, Adam B, Musat N, Kalvelage T, Lavik G, Wolf-gladrow D, et al. Carbon ,  
657 nitrogen and O<sub>2</sub> fluxes associated with the cyanobacterium *Nodularia spumigena* in  
658 the Baltic Sea. *ISME J. Nature Publishing Group;* 2011;5: 1549–1558.  
659 doi:10.1038/ismej.2011.20
- 660 43. Adam B, Klawonn I, Svedén JB, Bergkvist J, Nahar N, Walve J, et al. N<sub>2</sub>-fixation,  
661 ammonium release and N-transfer to the microbial and classical food web within a  
662 plankton community. *ISME J.* 2016;10: 450–459. doi:10.1038/ismej.2015.126
- 663 44. Bombar D, Paerl RW, Riemann L. Marine Non-Cyanobacterial Diazotrophs: Moving  
664 beyond Molecular Detection. *Trends Microbiol. Elsevier Ltd;* 2016;24: 916–927.  
665 doi:10.1016/j.tim.2016.07.002
- 666 45. Halm H, Lam P, Ferdelman TG, Lavik G, Dittmar T, Laroche J, et al. Heterotrophic  
667 organisms dominate nitrogen fixation in the South Pacific Gyre. 2012; 1238–1249.  
668 doi:10.1038/ismej.2011.182

- 669 46. Delmont TO, Quince C, Shaiber A, Esen ÖC, Lee ST, Rappé MS, et al. Nitrogen-fixing  
670 populations of Planctomycetes and Proteobacteria are abundant in surface ocean  
671 metagenomes. *Nat Microbiol.* 2018;3: 804–813. doi:10.1038/s41564-018-0176-9
- 672 47. Inoue J, Oshima K, Suda W, Sakamoto M, Iino T, Noda S, et al. Distribution and  
673 Evolution of Nitrogen Fixation Genes in the Phylum Bacteroidetes. *Microbes Environ.*  
674 2015;30: 44–50. doi:10.1264/jisme2.ME14142
- 675 48. Bowman JS, Ducklow HW. Microbial Communities Can Be Described by Metabolic  
676 Structure : A General Framework and Application to a Seasonally Variable , Depth-  
677 Stratified Microbial Community from the Coastal West Antarctic Peninsula. 2015; 1–  
678 18. doi:10.1371/journal.pone.0135868
- 679 49. Dawson W, Hör J, Egert M, Kleunen M Van, Pester M. A Small Number of Low-  
680 abundance Bacteria Dominate Plant Species-specific Responses during Rhizosphere  
681 Colonization. 2017;8: 1–13. doi:10.3389/fmicb.2017.00975
- 682 50. Benjamino J, Lincoln S, Srivastava R, Graf J. Low-abundant bacteria drive  
683 compositional changes in the gut microbiota after dietary alteration. *Microbiome*;  
684 2018; 1–13.
- 685 51. Mühlenbruch M, Grossart H-P, Eigemann F, Voss M. Phytoplankton-derived  
686 polysaccharides in the marine environment and their interactions with heterotrophic  
687 bacteria. *Environ Microbiol.* 2018;20: 2671–2685. doi:10.1111/1462-2920.14302
- 688 52. Bonnet S, Dekaezemacker J, Turk-kubo KA, Moutin T, Hamersley RM, Grosso O, et al.  
689 Aphotic N<sub>2</sub> Fixation in the Eastern Tropical South Pacific Ocean. 2013;8: 1–14.  
690 doi:10.1371/journal.pone.0081265

- 691 53. Moisander PH, Steppe TF, Hall NS, Kuparinen J, Paerl HW. Variability in nitrogen and  
692 phosphorus limitation for Baltic Sea phytoplankton during nitrogen-fixing  
693 cyanobacterial blooms. 2003;262: 81–95.
- 694 54. Graham LE, Knack JJ, Piotrowski MJ, Wilcox LW, Cook ME, Wellman CH, et al.  
695 Lacustrine Nostoc (Nostocales) and associated microbiome generate a new type of  
696 modern clotted microbialite. J Phycol. 2014;291: 280–291. doi:10.1111/jpy.12152
- 697 55. Frischkorn KR, Haley ST, Dyhrman ST. Coordinated gene expression between  
698 Trichodesmium and its microbiome over day-night cycles in the North Pacific  
699 Subtropical Gyre. ISME J. Springer US; 2018;12: 997–1007. doi:10.1038/s41396-017-  
700 0041-5
- 701 56. Zulkifly S, Hanshew A, Young EB, Lee P, Graham ME, Graham ME, et al. The epiphytic  
702 microbiota of the globally widespread macroalga *Cladophora glomerata* (Chlorophyta,  
703 Cladophorales). Am J Bot. 2012;99: 1541–1552. doi:10.3732/ajb.1200161
- 704

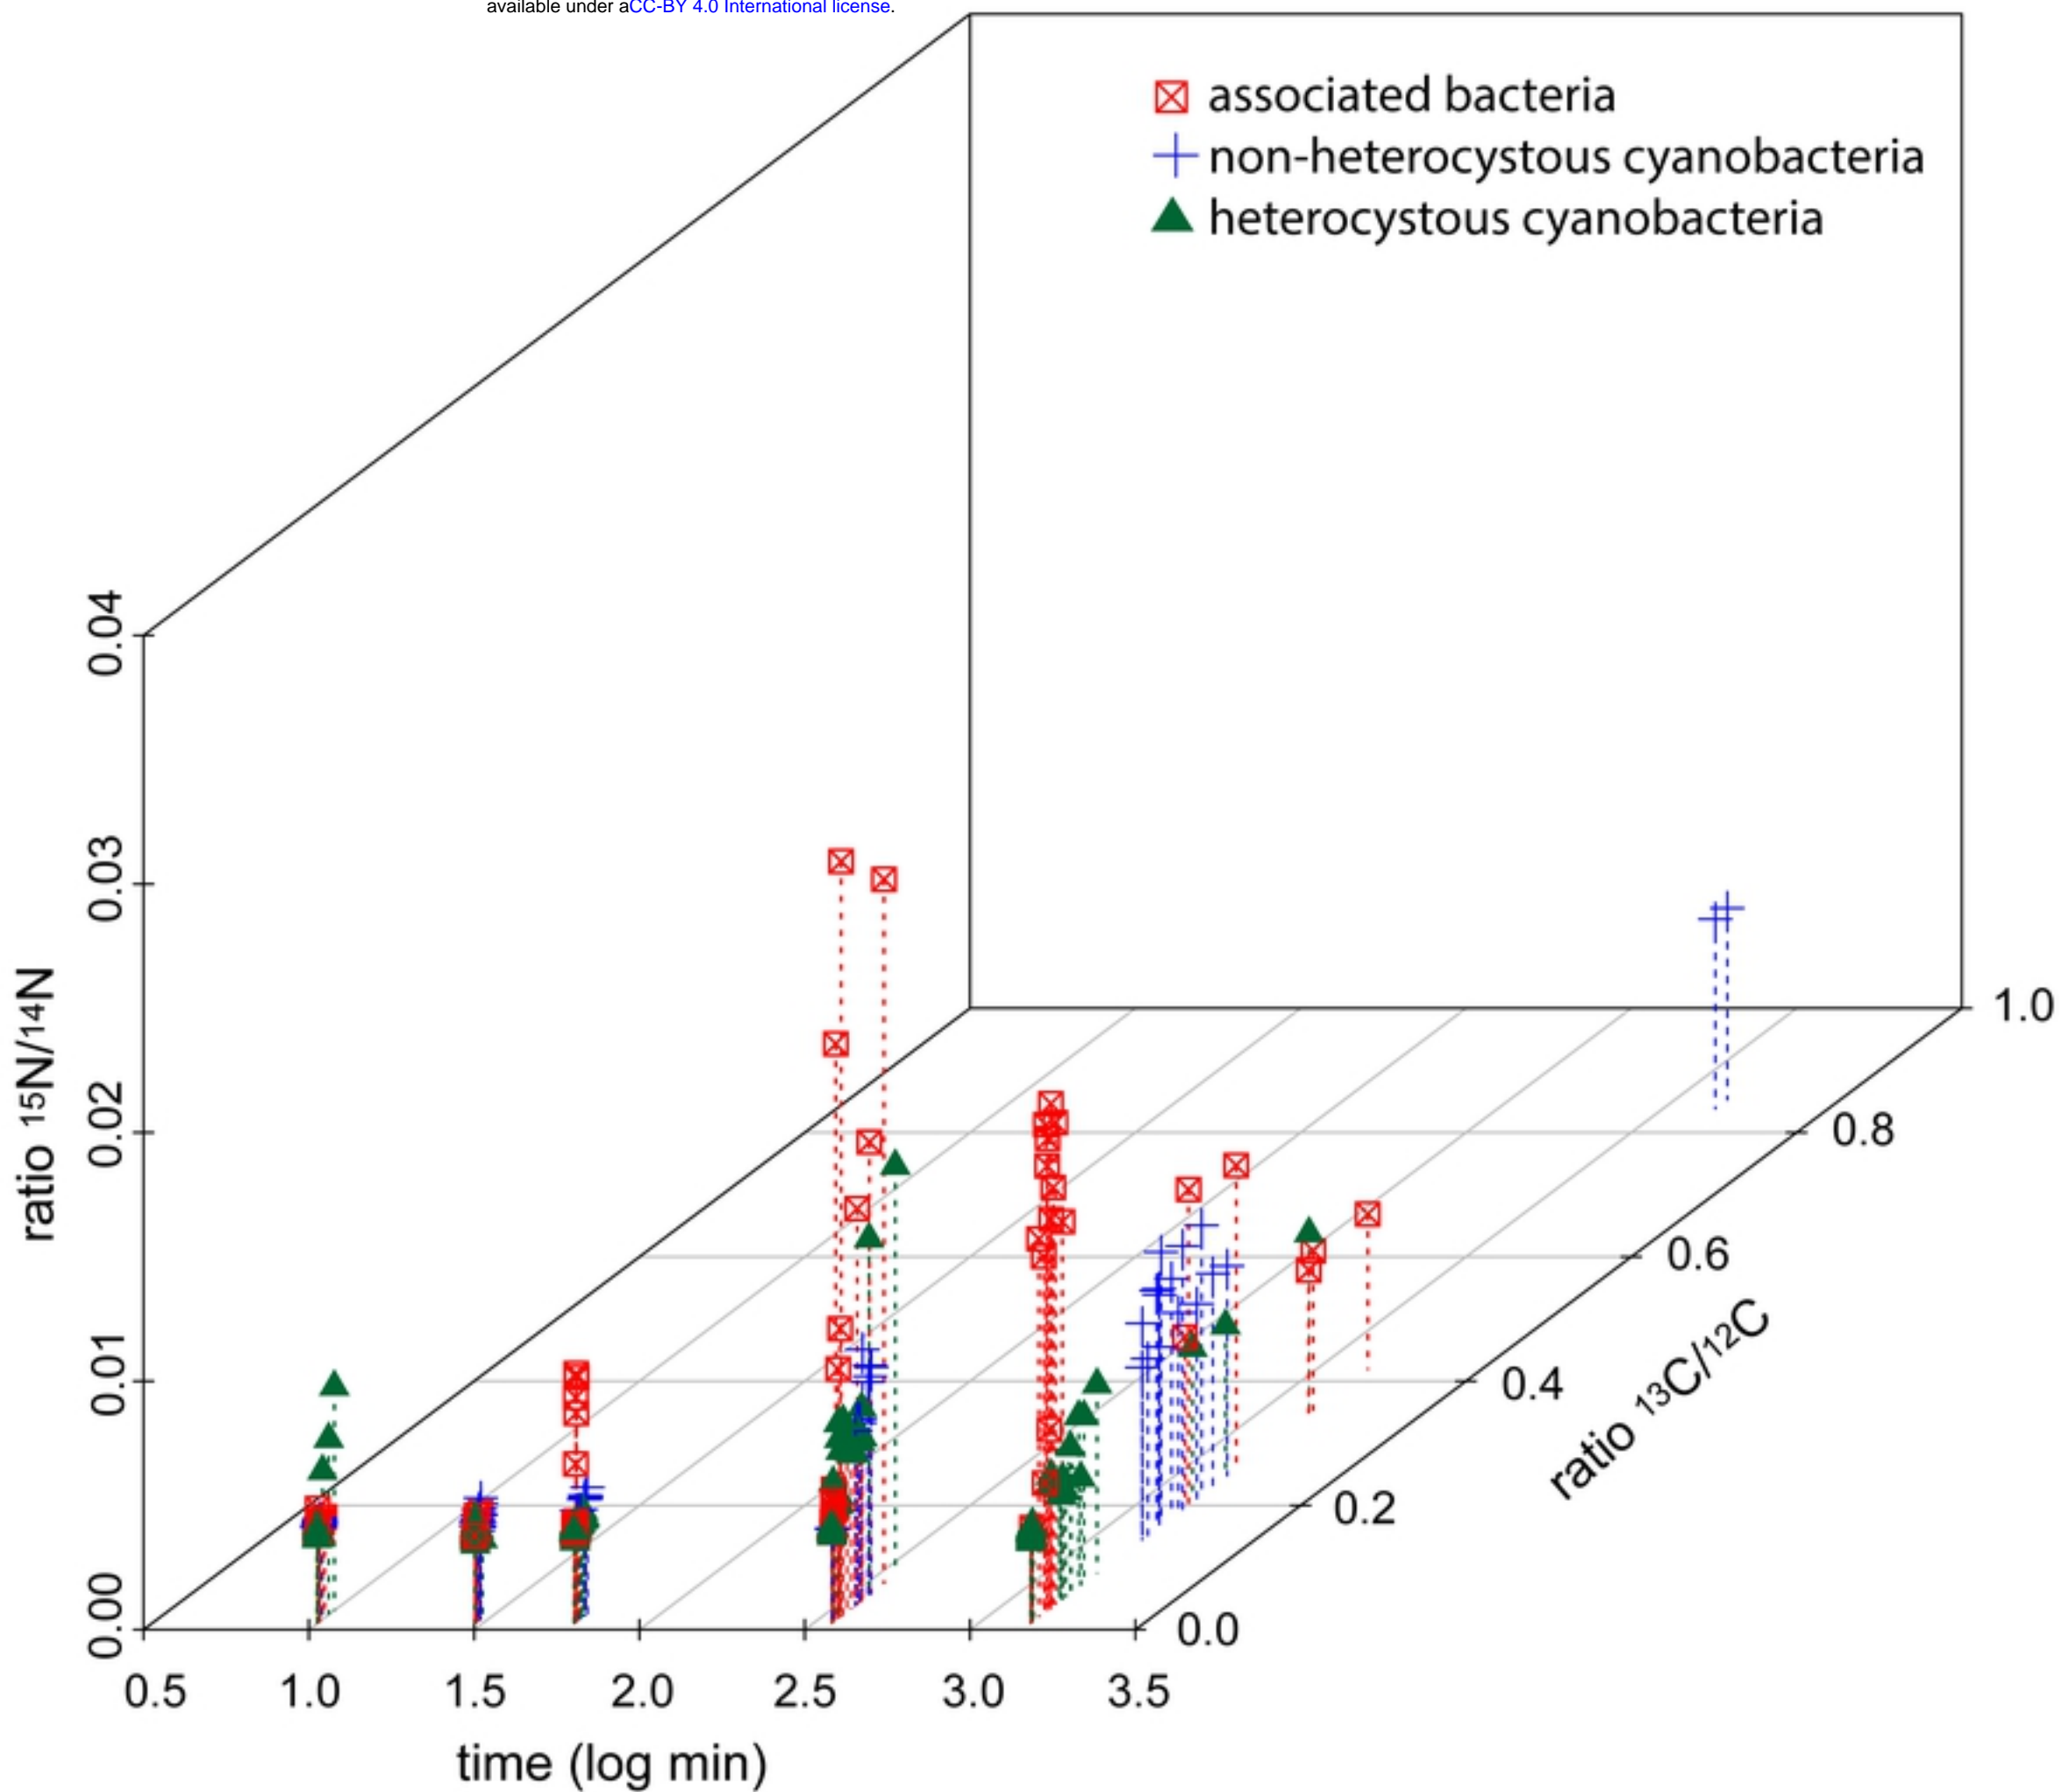

Fig. 7



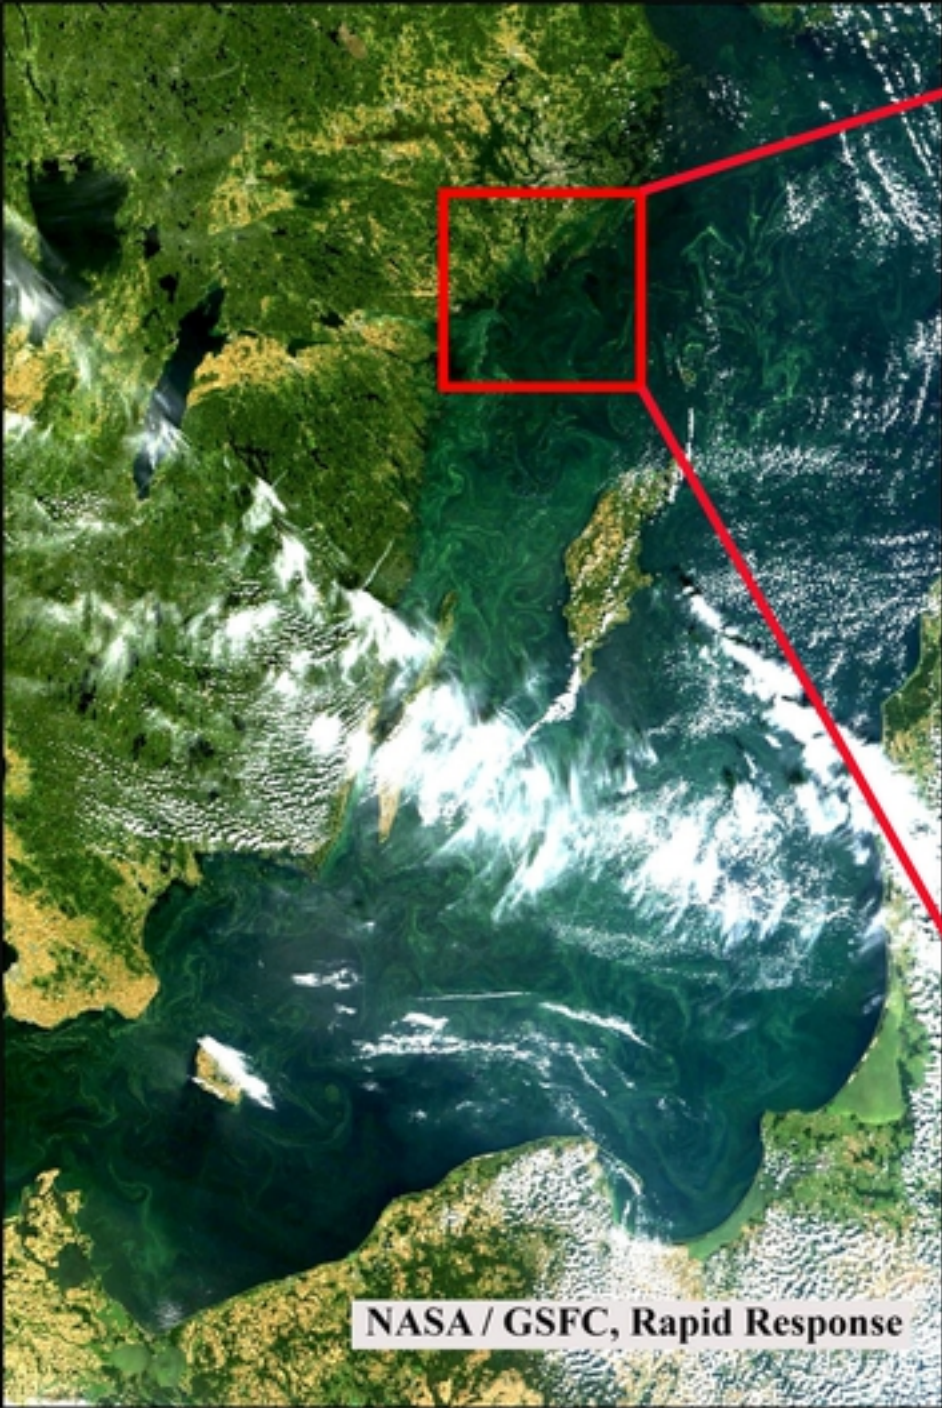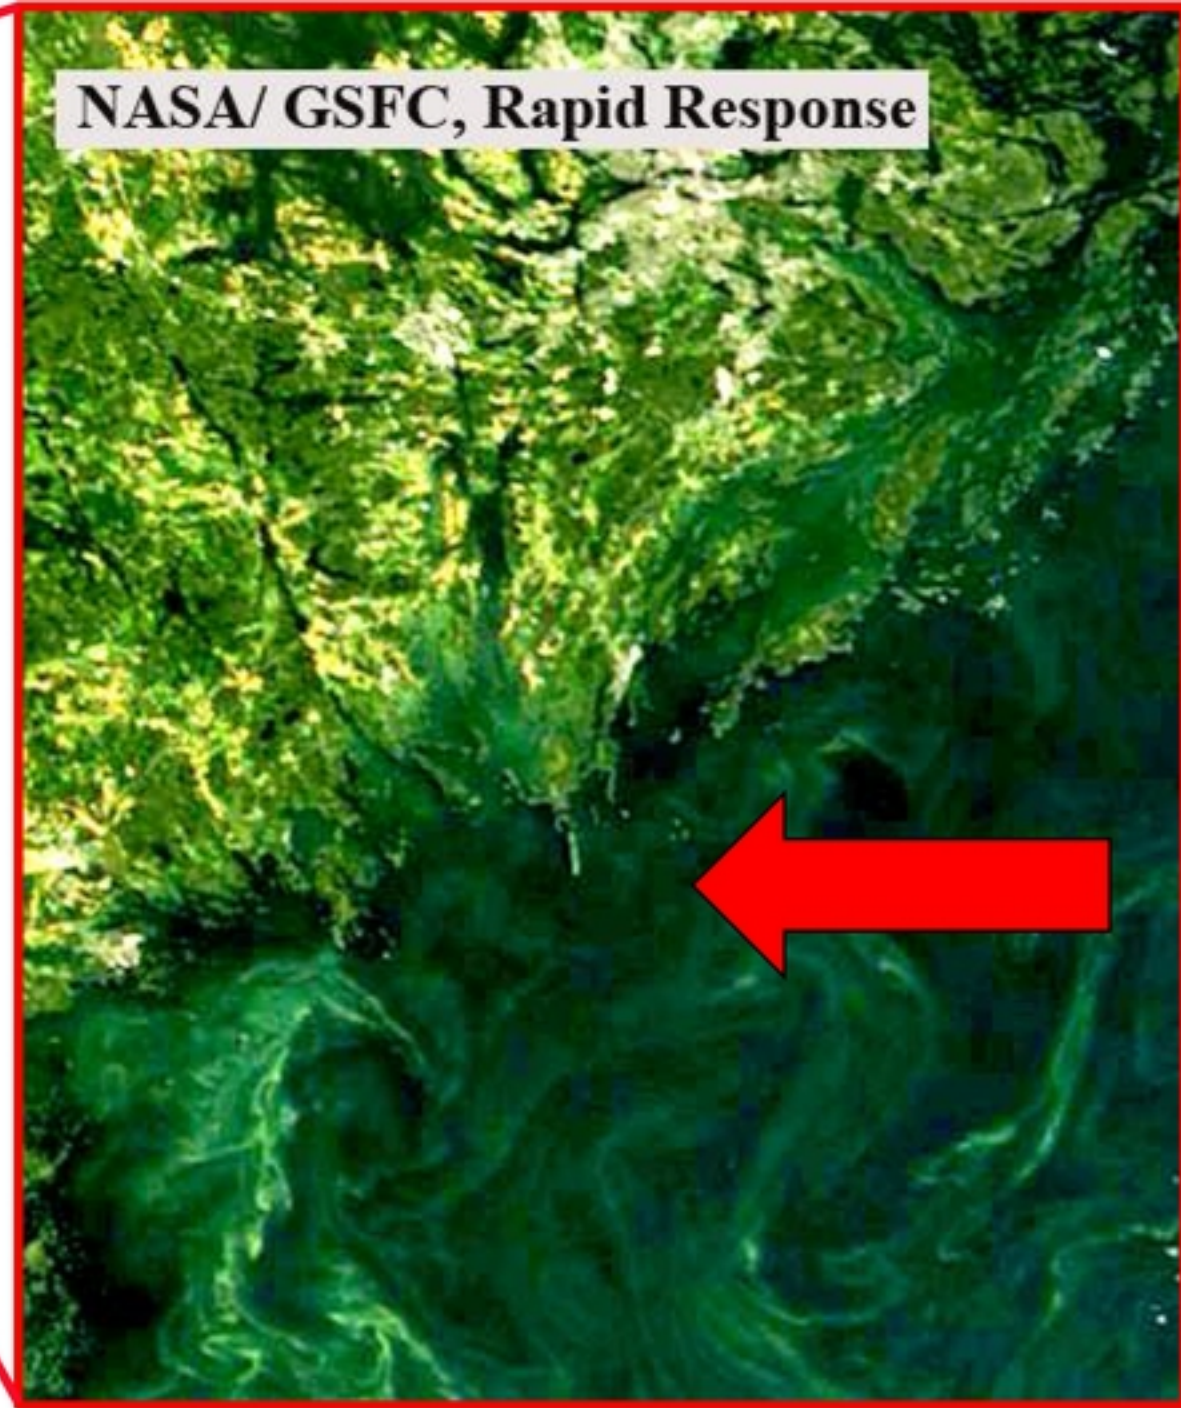

Fig. 1

**A**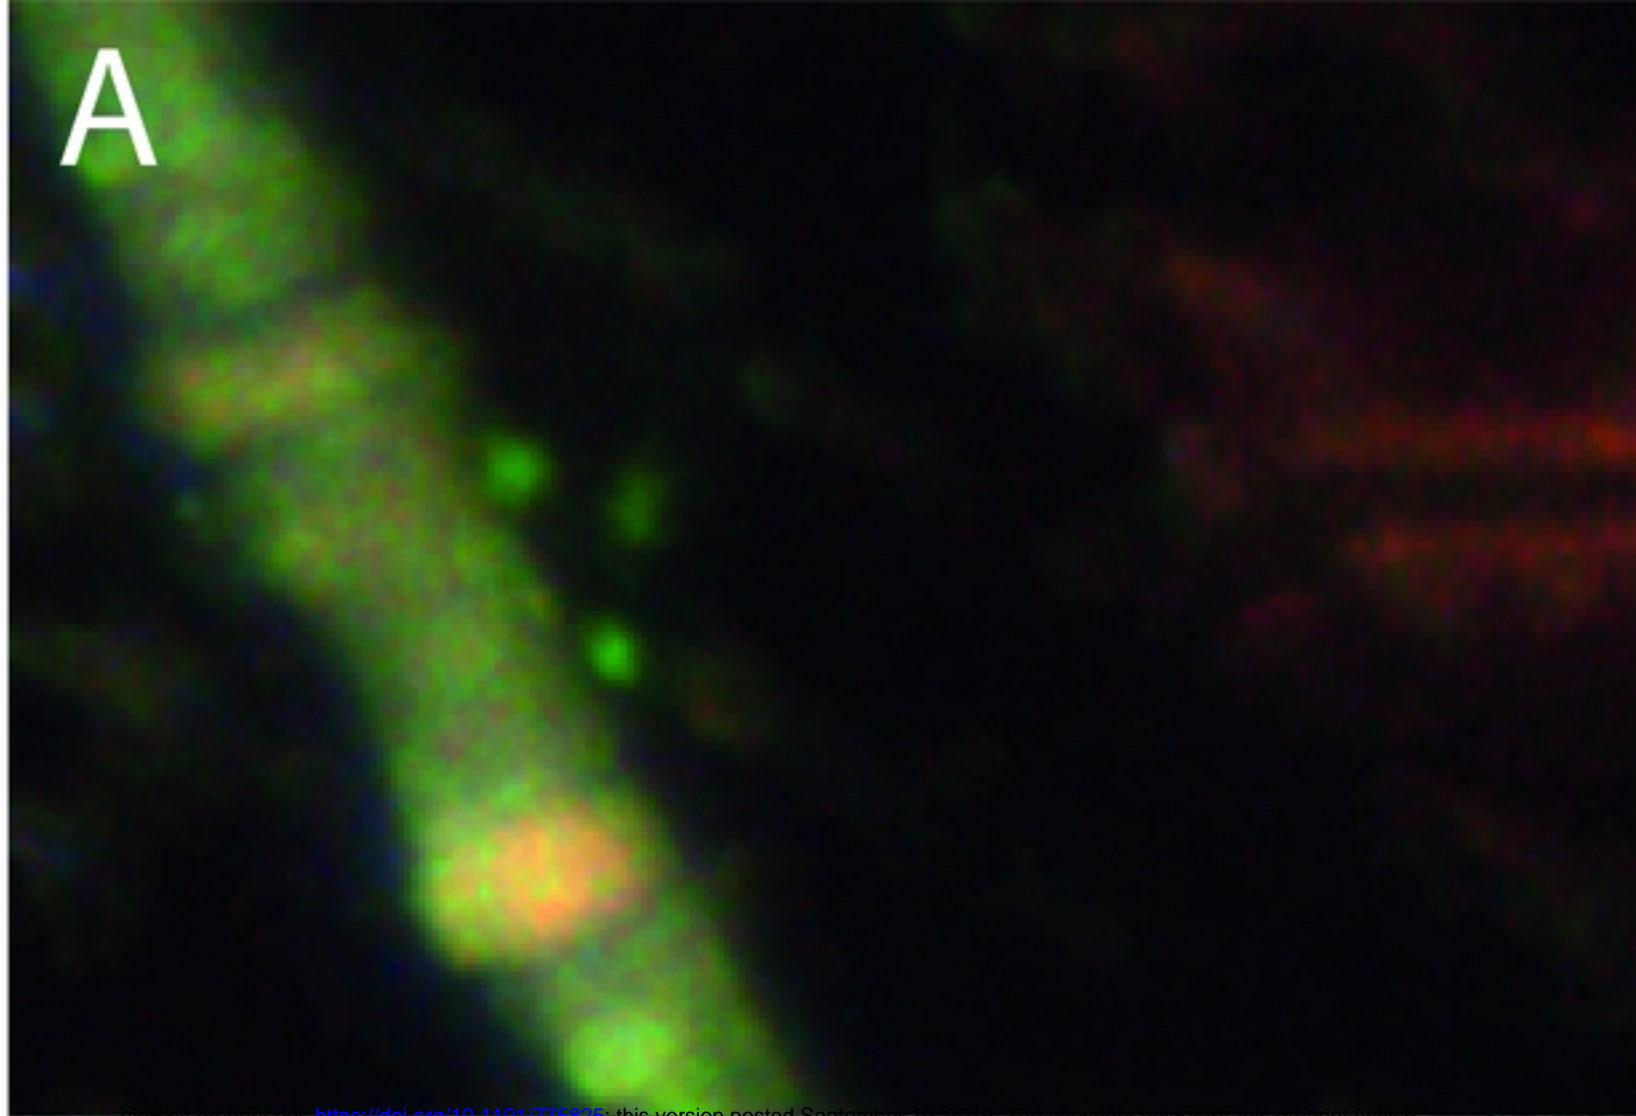

bioRxiv preprint doi: <https://doi.org/10.1101/775825>; this version posted September 19, 2019. The copyright holder for this preprint (which was not certified by peer review) is the author/funder, who has granted bioRxiv a license to display the preprint in perpetuity. It is made available under aCC-BY 4.0 International license.

**B**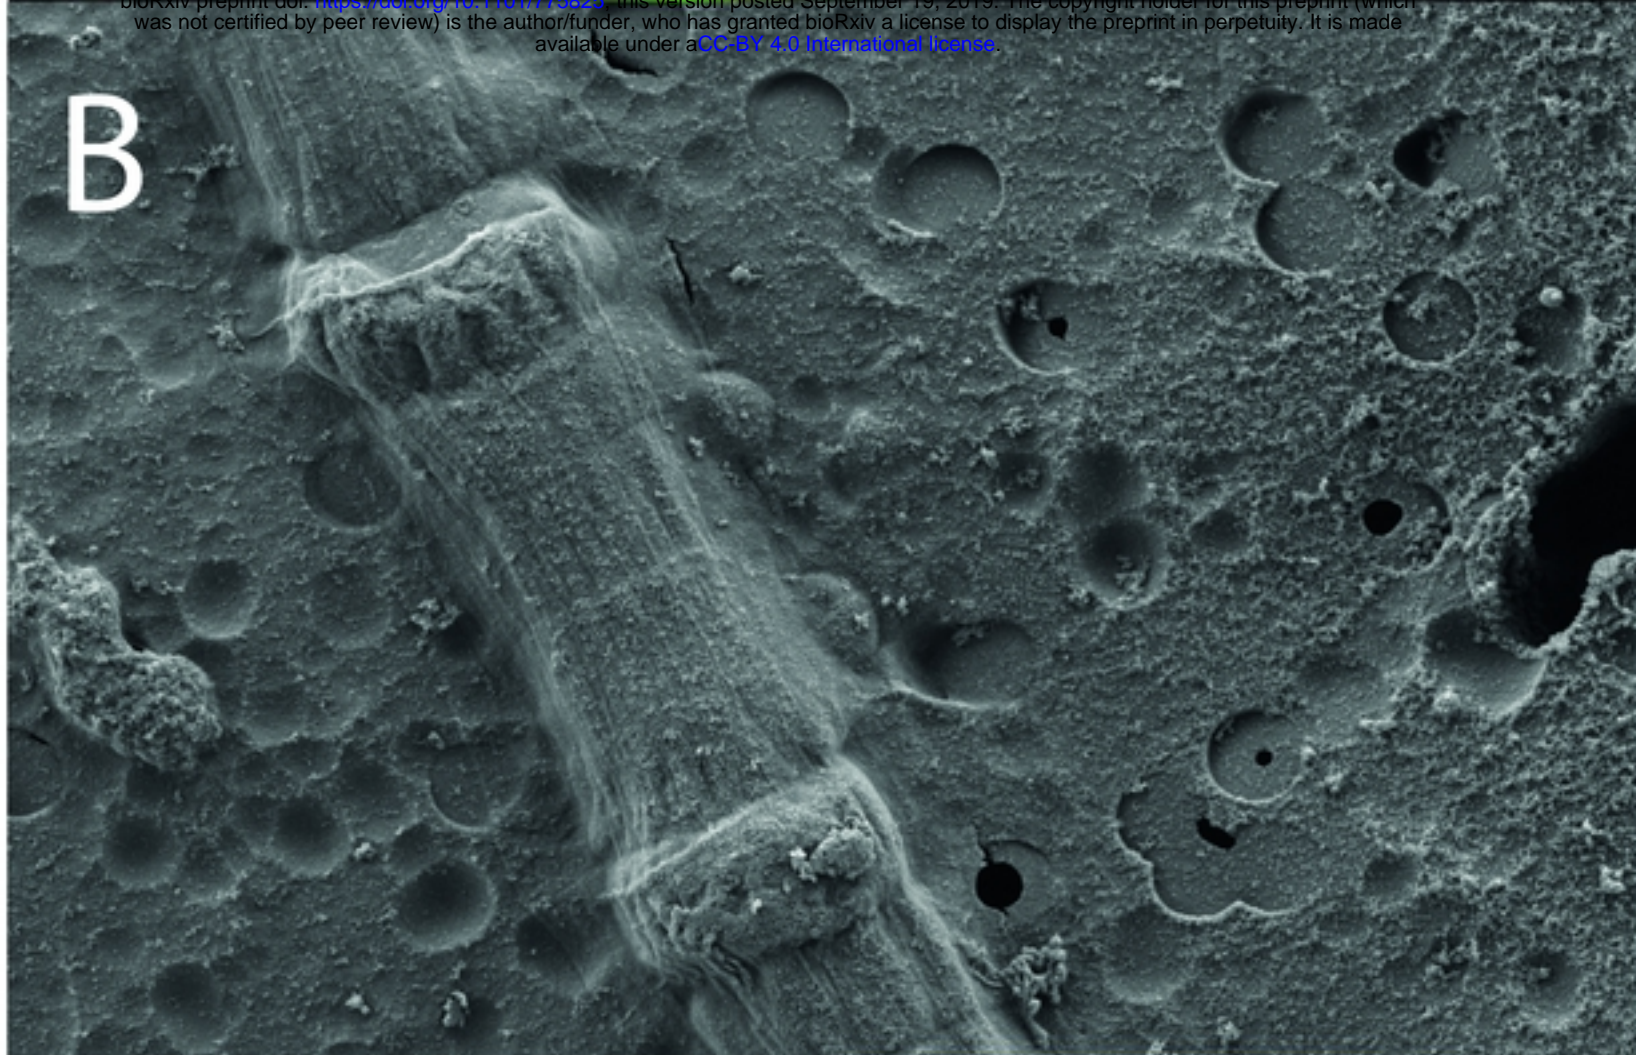**C**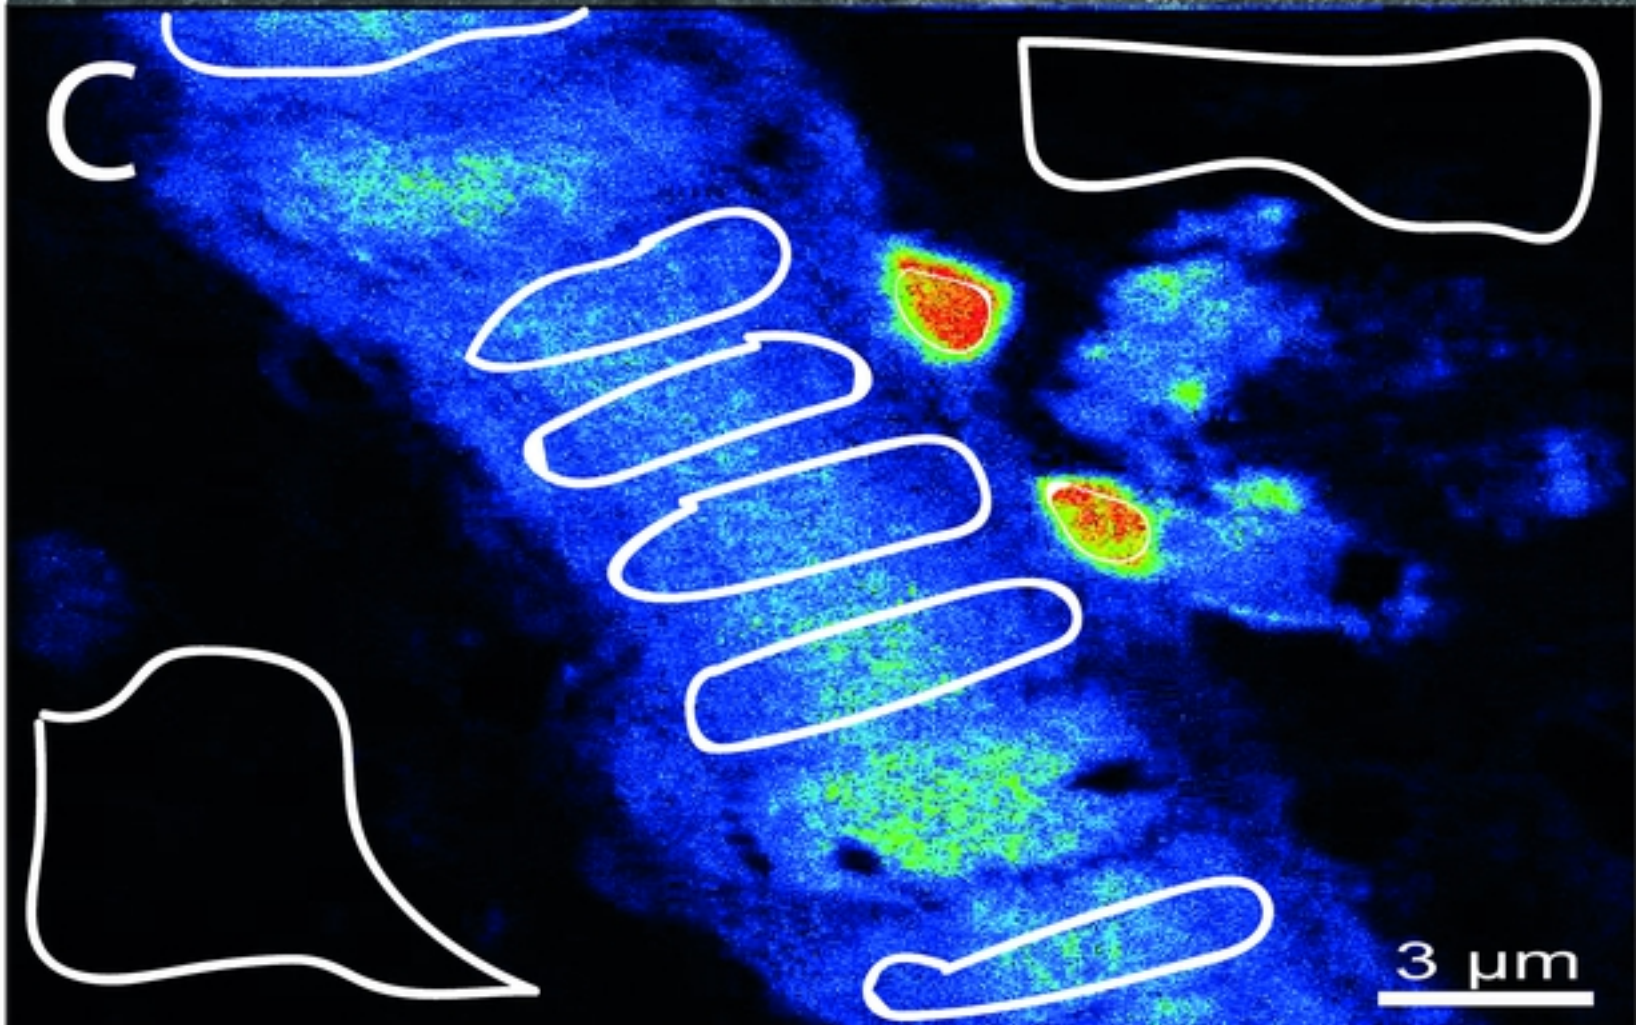

Fig. 2

Phytoplankton  
% biomass

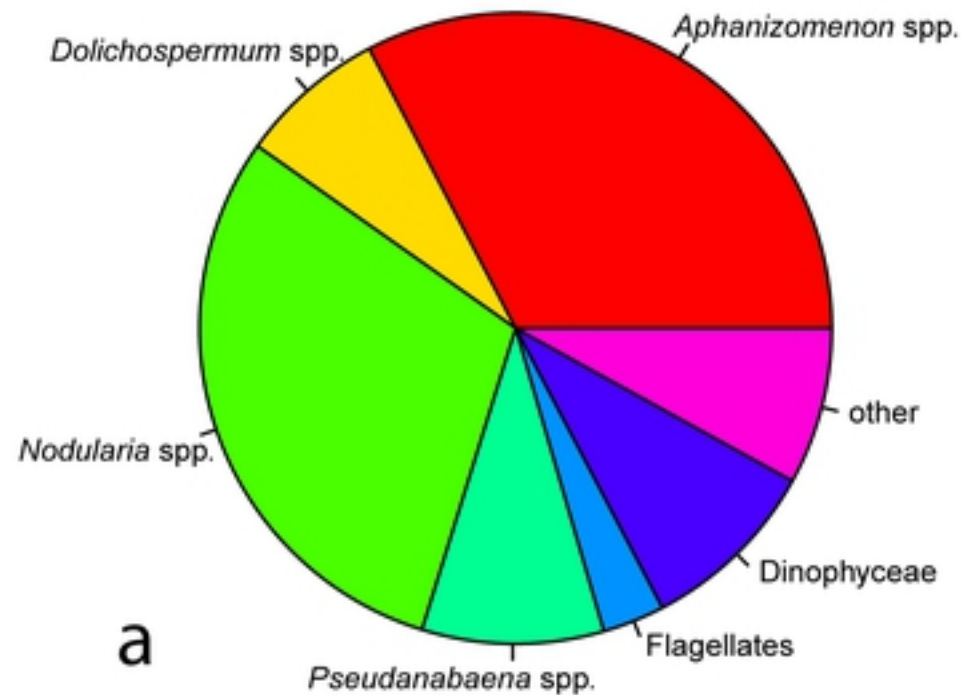

Heterotrophic bacteria  
% reads

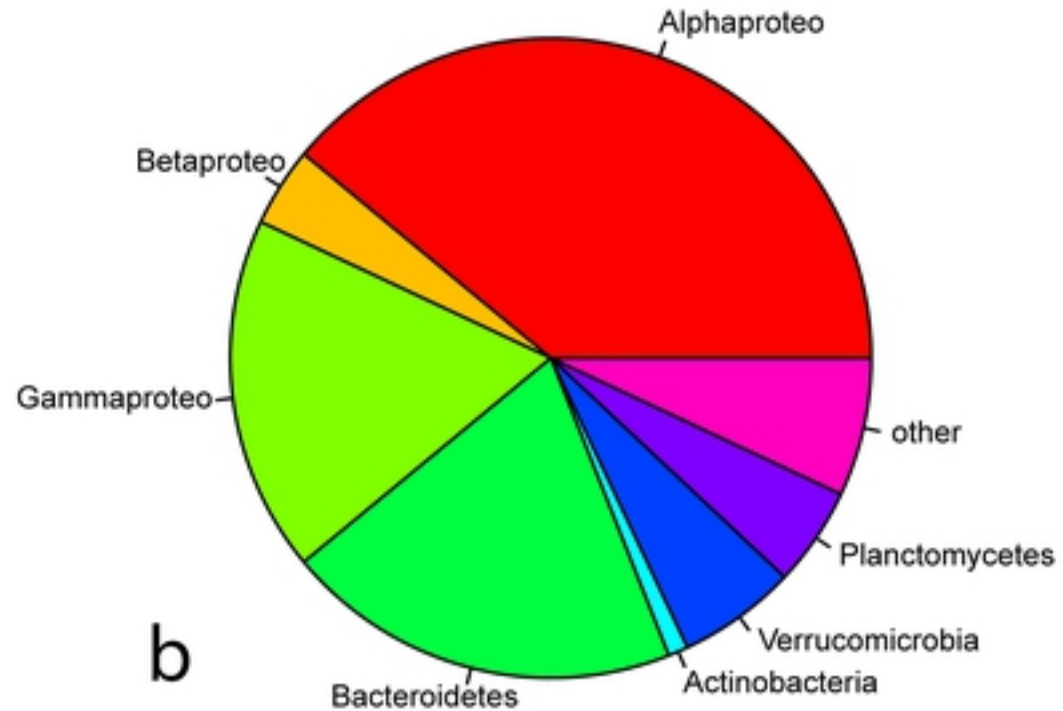

Fig. 3

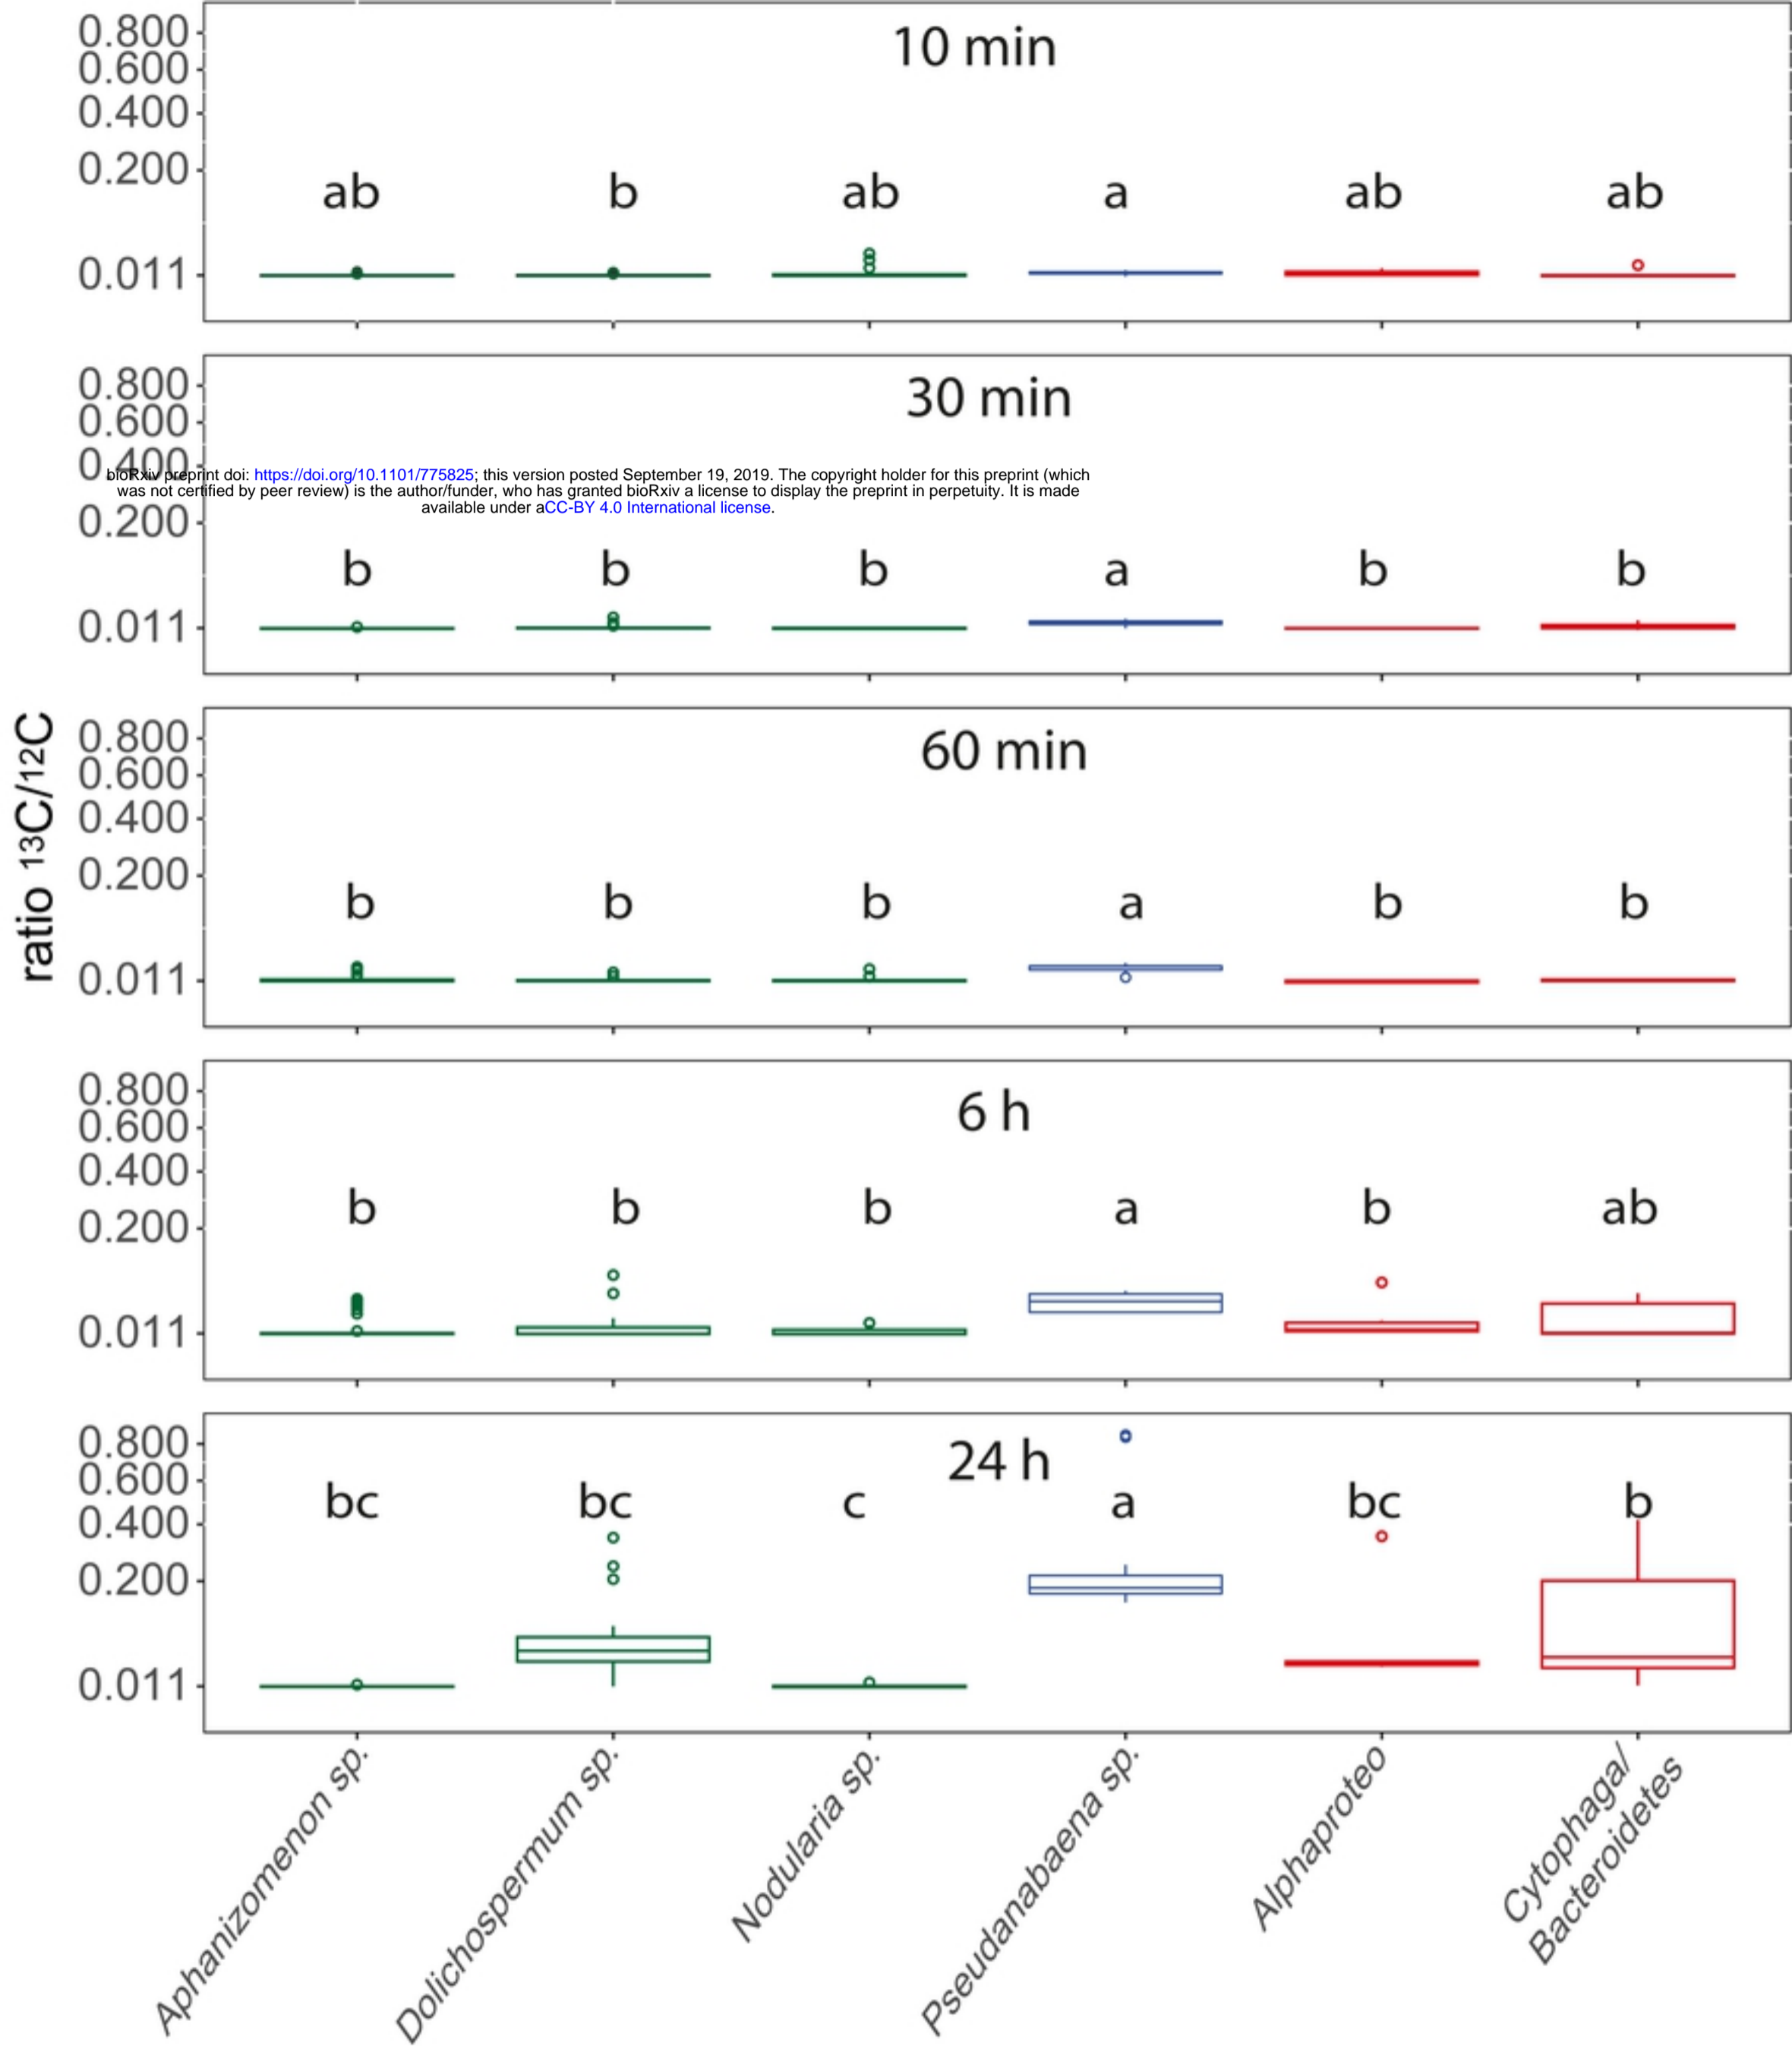

Fig. 5

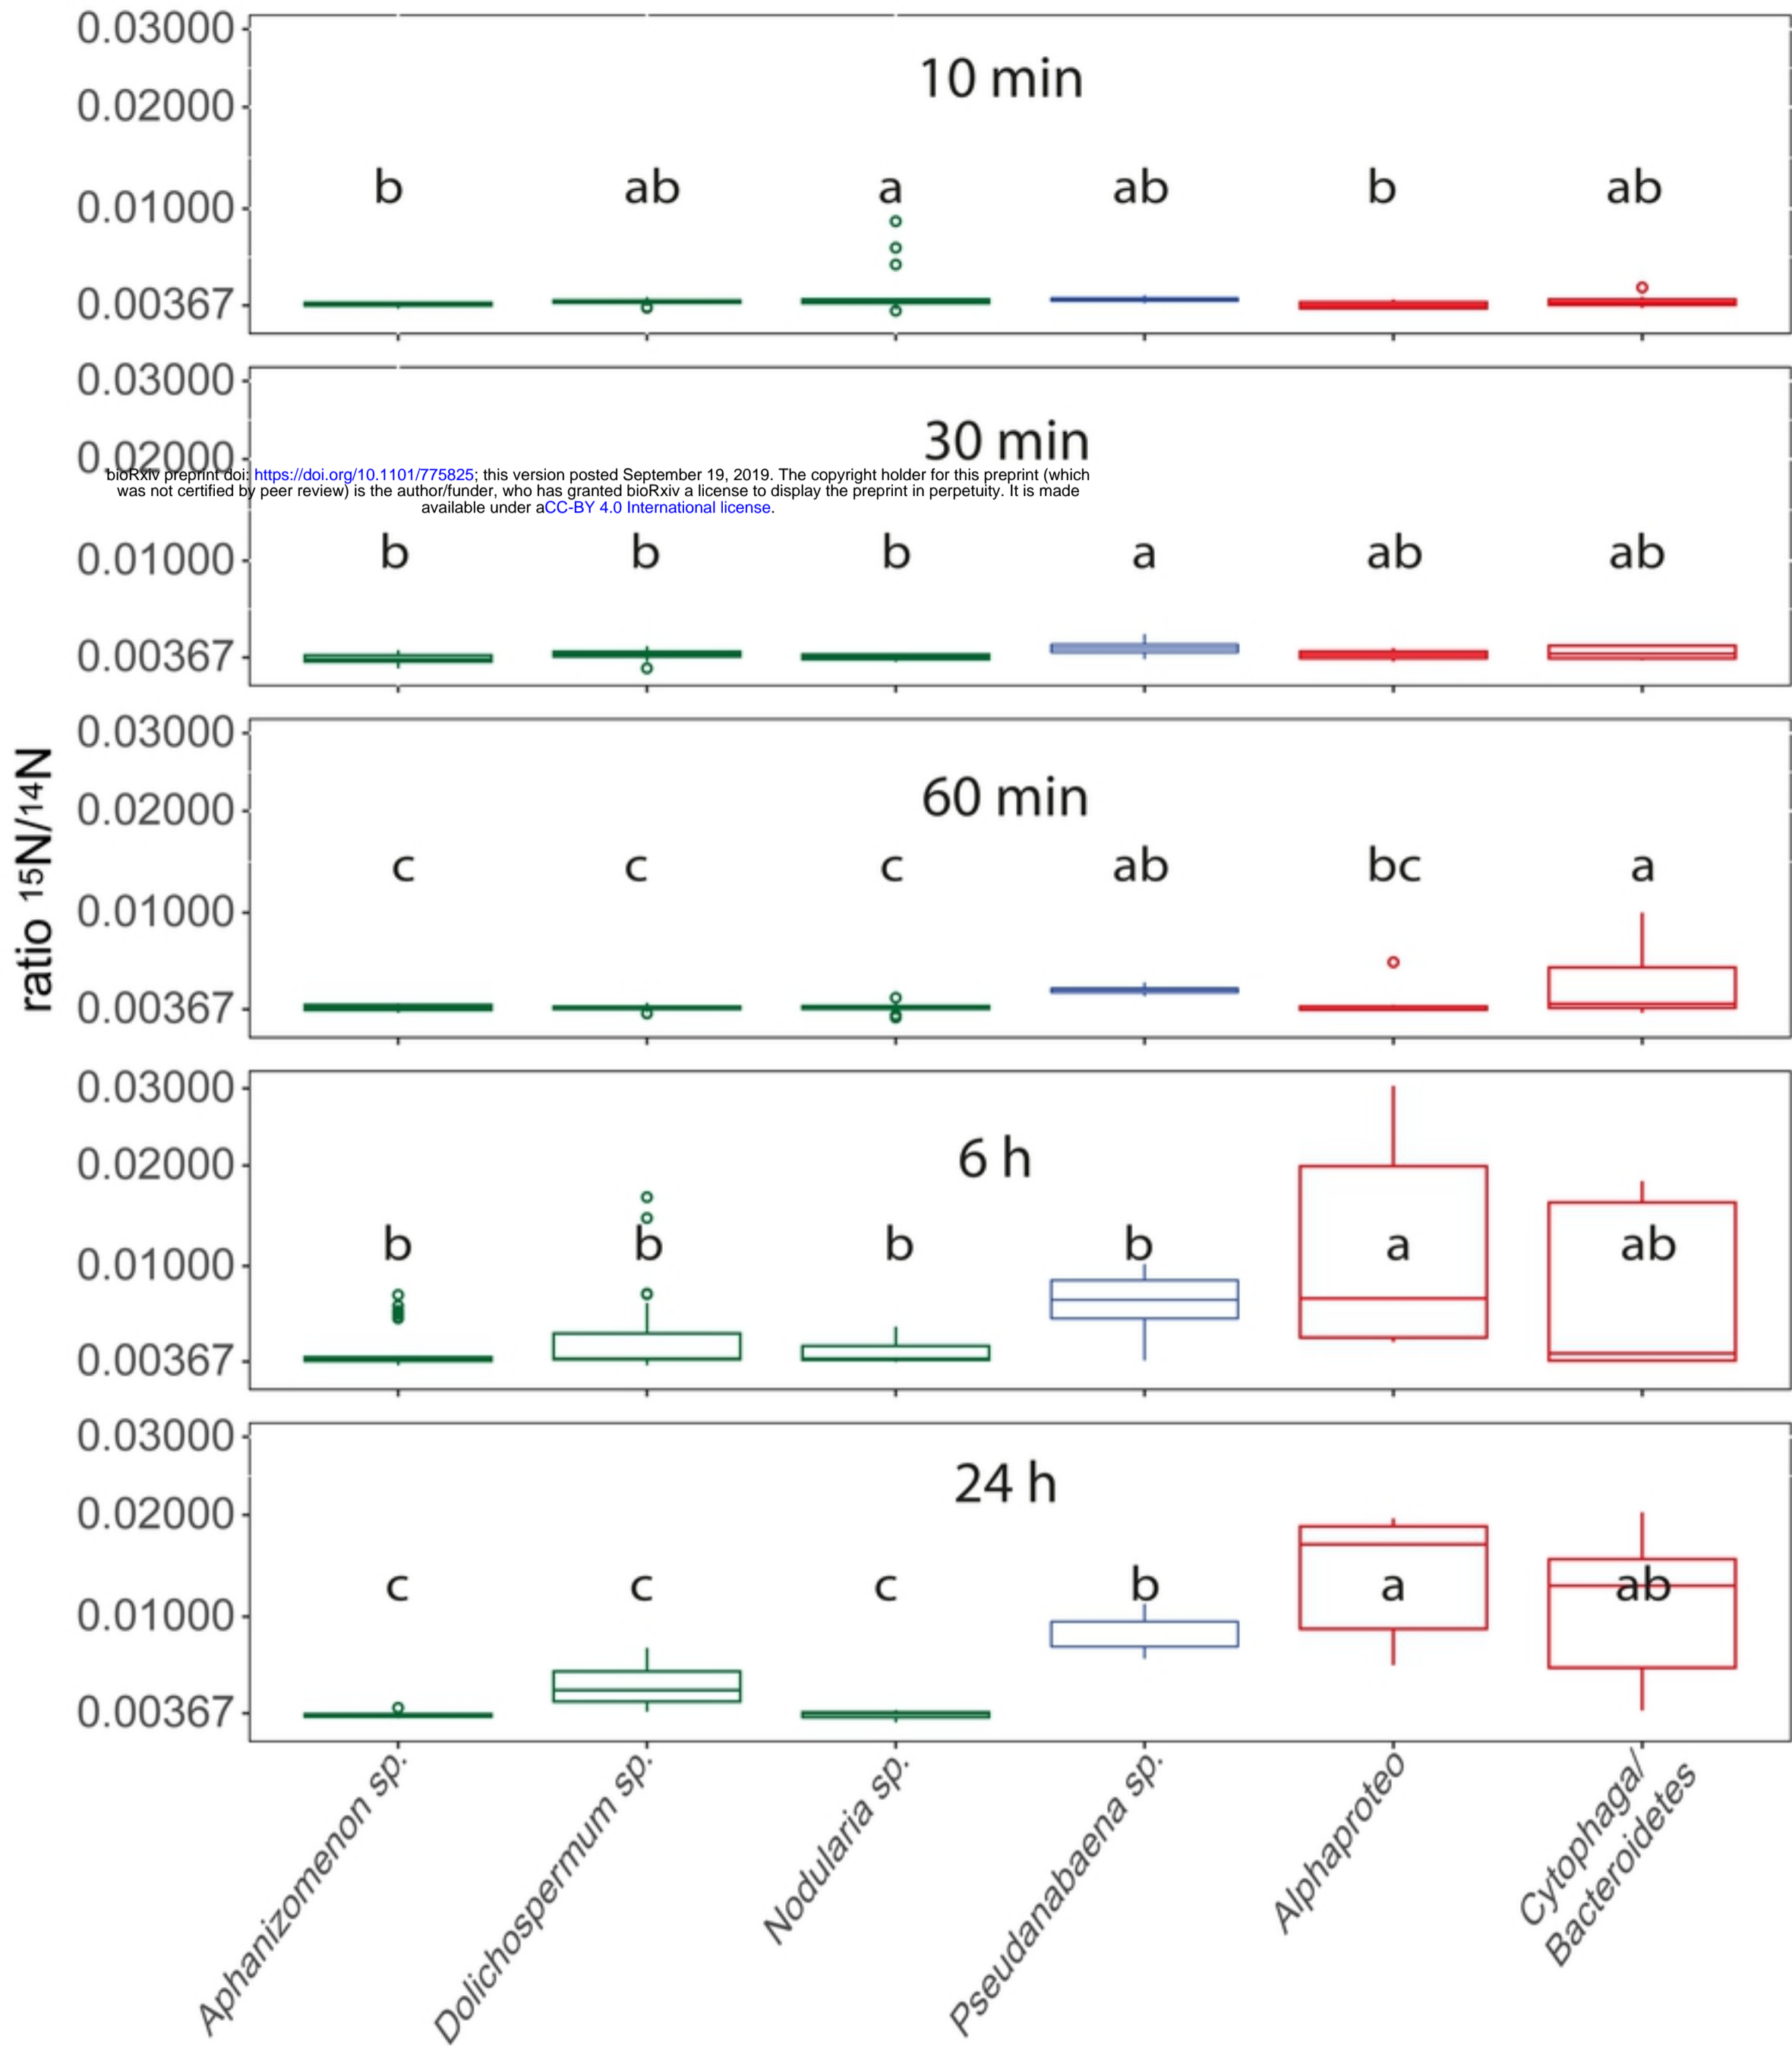

Fig. 6

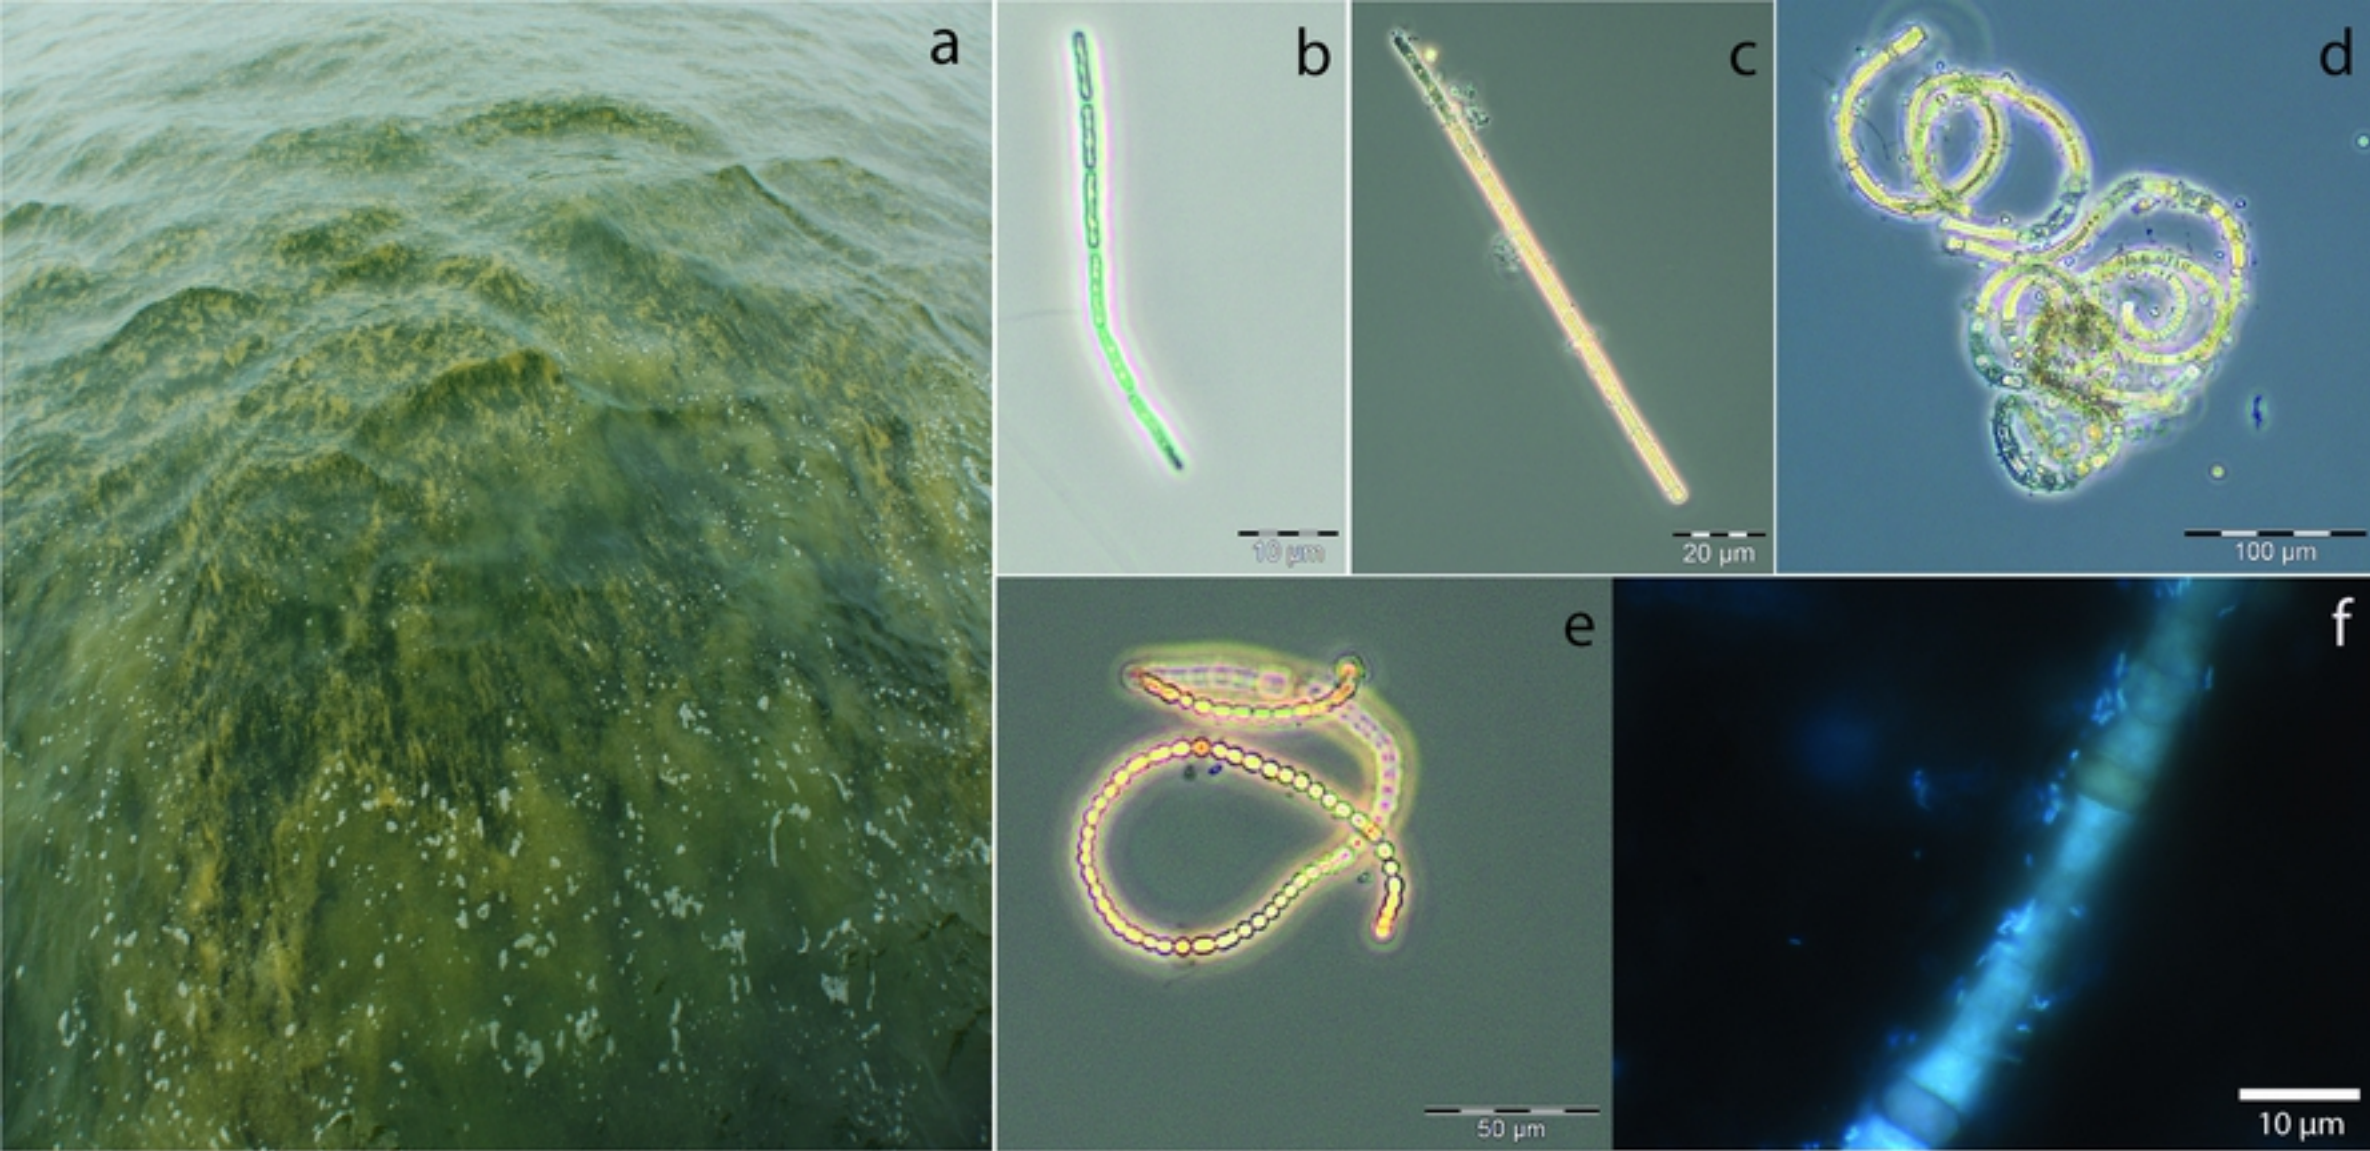

Fig. 4
